# The spinal control of ejaculation revisited: a systematic review and meta-analysis of anejaculation in spinal cord injured patients

Clément Chéhensse<sup>1</sup>, Stéphane Bahrami<sup>2,3</sup>, Pierre Denys<sup>1,4</sup>,  
Pierre Clément<sup>1</sup>, Jacques Bernabé<sup>1</sup>, and François Giuliano<sup>1,4,\*</sup>

<sup>1</sup>EA 4501 SIRIUS, Université de Versailles Saint Quentin en Yvelines, Montigny-Le-Bretonneux, France <sup>2</sup>EA 4497 GRCTH, Université de Versailles Saint Quentin en Yvelines, Montigny-Le-Bretonneux, France <sup>3</sup>Public Health Department, Raymond Poincaré Hospital, APHP, Garches, France

<sup>4</sup>Neuro-Uro-Andrology, Department of Physical Medicine and Rehabilitation, Raymond Poincaré Hospital, APHP, 104 bd Raymond Poincaré, 92380 Garches, France

\*Correspondence address. Tel: +33 1 47 10 77 48; Fax: +33 1 47 10 44 43; E-mail: francois.giuliano@uvsq.fr

Submitted on December 14, 2012; resubmitted on May 12, 2013; accepted on May 15, 2013

## TABLE OF CONTENTS

- Introduction
- Methods
  - Eligibility criteria
  - Search strategy
  - Selection criteria
  - Data extraction
  - Data synthesis
  - Statistical analysis
- Results
  - Identification
  - Qualitative synthesis of studies included
  - Overall ejaculation rates according to the type of stimulation
  - Comparison of ejaculation rates according to the type of stimulation in patients with complete SCI
  - Comparison of ejaculation rates with PVS according to penile vibrator settings in patients with complete SCI
  - Impact of the duration of SCI on ejaculation
  - Ejaculation rates according to the status of the spinal ejaculation centres in patients with complete SCI
  - Characterization of ejaculation
  - Assessment of the existence of a SGE
- Discussion
  - Ejaculation rates according to the status of the T12 to S5 segments
  - Assessment of the existence of a SGE
  - Conclusion

**BACKGROUND:** After spinal cord injury (SCI), most men cannot ejaculate without medical assistance. A major advance in the knowledge of the spinal control of ejaculation has been achieved with the discovery of a spinal generator of ejaculation (SGE) in the rat. The aim of this report was to review studies about ejaculation after SCI in order to revisit the spinal control of ejaculation and especially to assess the existence of an SGE in man.

**METHODS:** Studies were identified from Embase, PubMed, EBSCOhost and Cochrane Library. Studies were eligible when they specify the occurrence of antegrade ejaculation as a function of the neurological characterization of SCI. Studies were excluded when ejaculation was elicited by rectal electrical stimulation or when ejaculation could not be discriminated from climax. Meta-analyses were performed to assess the reference ejaculation rates for each procedure used to elicit ejaculation, i.e. masturbation or coitus, penile vibratory stimulation (PVS) or acetylcholine esterase (AChE) inhibitors prior to masturbation. Subgroup analyses were performed according to the procedure used to elicit ejaculation on (i) the completeness of the SCI and (ii) the upper and lower limits of the SCI. To assess the existence of an SGE, the effect of concurrent lesions of different spinal segments was assessed by means of a stratified bivariate analysis.

**RESULTS:** From 523 studies, 45 were selected ( $n = 3851$ ). Ejaculation occurred in response to masturbation or coitus, PVS or AChE inhibitors followed by masturbation in, respectively, 11.8% ( $n = 1161$ ), 47.4% ( $n = 597$ ) and 54.7% ( $n = 309$ ) of patients with complete SCI and in, respectively, 33.2% ( $n = 343$ ), 52.8% ( $n = 305$ ) and 78.1% ( $n = 32$ ) of patients with incomplete SCI. Ejaculation, in the case of complete lesion of the sympathetic centres (T12 to L2), of the parasympathetic and somatic centres (S2–S4) or of all spinal ejaculation centres (T12 to S5) occurred in response to PVS in none of the patients (respectively,  $n = 5$ ,  $n = 4$  and  $n = 21$ ) and in response to AChE inhibitors followed by masturbation in 4.9% ( $n = 61$ ), 30.8% ( $n = 26$ ) and 0% ( $n = 16$ ) of the patients, respectively. Ejaculation in response to PVS or AChE inhibitors prior to masturbation was rhythmic forceful in 97.9% ( $n = 48$ ) of the patients with complete lesion strictly above Onuf's nucleus (segments S2–S4). Complete lesion of the S2–S4 segments precluded the occurrence of rhythmic forceful ejaculation ( $n = 5$ ). Controlling for the number of the injured segments between T12 and L2, the ejaculation rate sharply decreased when the lesion extended to the L3 segment and below.

**CONCLUSIONS:** The results reinforce the crucial roles of the spinal sympathetic and parasympathetic centres for emission and the somatic centre for expulsion. The spinal segments between L2 and S2 is more than a pathway to connect the ejaculation centres and likely harbours an SGE in man located in the L3, L4 and L5 segments.

**Key words:** paraplegia / quadriplegia / fertility / spinal generator of ejaculation / physiology

## Introduction

The incidence of traumatic spinal cord injury (SCI) is estimated at 16/million/year in Western Europe and 39/million/year in North America with a prevalence of 300/million and 853/million, respectively (Cripps *et al.*, 2011). Nowadays, the life expectancy of SCI patients tends to be close to that of the general population (Middleton *et al.*, 2012). In the USA, the mean age at occurrence of SCI is 37.1 years and 77.1% of SCI patients are male (Devivo, 2012). In addition to motor and sensory loss, uro-genito-sexual functions are severely impaired by SCI including, in males, erection and ejaculation, causing major sexual and fertility issues. Among the patients' priorities regarding recovery, sexual function is the highest in paraplegic patients and the second highest in quadriplegic patients (Anderson, 2004). Many SCI males have not fulfilled their parental project at the time of the trauma. Fatherhood is still possible although it often requires specialized medical management which can be complex, time-consuming, expensive and not totally devoid of safety issues for the patients as well as their female partners.

Ejaculation can be physiologically defined as the rhythmic forceful expulsion of semen at the urethral meatus. Ejaculation comprises two successive phases, emission and expulsion, each involving different pelvic-perineal anatomical structures (Giuliano and Clement, 2005). Emission is controlled by autonomic (sympathetic and parasympathetic) spinal centres and expulsion is controlled by somatic spinal centres. These centres act in synchrony in order for antegrade ejaculation to occur. Such a synchronization has been reported to be led, in rats, by a group of lumbar spinothalamic neurons forming a spinal generator of ejaculation (SGE). The critical role of the SGE and its organization have been described during the last decade in functional and neuroanatomical studies (Truitt and Coolen, 2002; Xu *et al.*, 2005, 2006; Borgdorff *et al.*, 2008; Sun *et al.*, 2009). In rats, the SGE is located in lamina X

and the medial part of lamina VII, around the central canal, at the third and fourth lumbar (L3–L4) spinal segments (Fig. 1).

The SGE activity is influenced by peripheral and brain inputs which can either be excitatory or inhibitory. Neurons belonging to the brain circuitry that specifically controls ejaculation have been identified in rodents (Coolen *et al.*, 1998; Heeb and Yahr, 2001; Hamson and Watson, 2004), although their exact role and nature are not yet fully delineated. Overall, a major advance in the understanding of the experimental neurophysiology of ejaculation has been achieved.

In humans, the innervation of anatomical structures involved in ejaculation is organized in a similar manner to that in rats. Due to differences in metamerization between the two species, there are slight differences in the spinal cord segments in which preganglionic autonomic neurons and somatic motoneurons are located. In the human spinal cord (Fig. 2), the parasympathetic centres located in the intermediolateral cell column (IML) of the S2–S4 segments innervate the accessory sex glands, i.e. the seminal vesicles and the prostate (Onufrowicz, 1899). The sympathetic centres located in the IML and the dorsal grey commissure of the lower thoracic and upper lumbar segments innervate the smooth muscle cells of the entire seminal tract, including the epididymis, the vas deferens, the seminal vesicles, the prostate, the prostatic urethra and the bladder neck. For the sympathetic centres which control the ejaculation, depending on the authors, the upper limit is T9, T10 or more often T11 and the lower limit is L2 or L3. According to earlier anatomical studies of sympathetic innervation, the cell bodies of preganglionic sympathetic neurons innervating the accessory glands are mainly located in segments L1 and L2 (Müller and Dahl, 1912) with their axons reaching the paravertebral sympathetic ganglia and the hypogastric plexus (Dejerine, 1914). Furthermore, after sympathectomy, ejaculation is the most impaired after bilateral removal of the T12–L2 paravertebral sympathetic ganglia (Whitelaw and Smithwick, 1951; Courty and

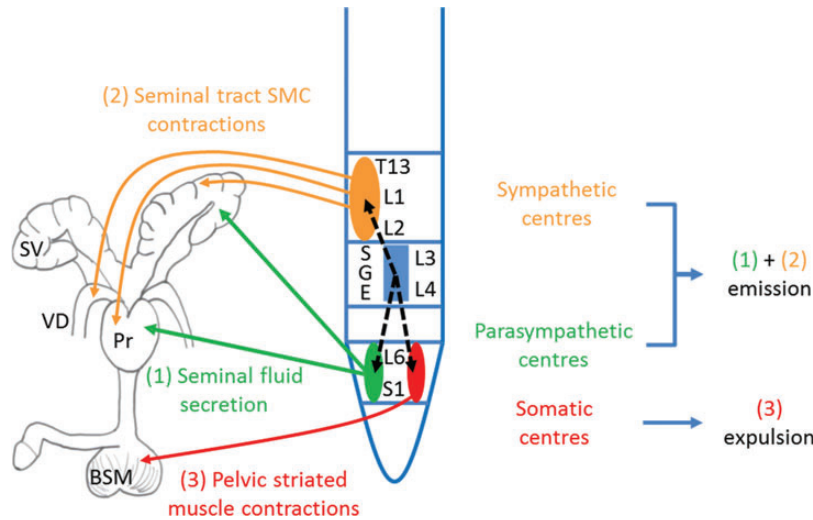

**Figure 1** Spinal and peripheral neural control of ejaculation in rats. Once activated the SGE commands and coordinates the activity of: (1) parasympathetic centres which innervate the accessory sex glands (prostate and seminal vesicles) secreting seminal fluid. (2) Sympathetic centres which innervate smooth muscle cells of the seminal tract and the bladder neck. Contraction of the whole seminal tract brings spermatozoa mixed with the seminal fluid to the prostatic urethra. The bladder neck remains closed to prevent the sperm flowing backwards into the bladder (retrograde ejaculation). (3) Somatic centres that innervate the pelvic striated muscles. The external urethral sphincter relaxes and rhythmic contractions of the bulbo spongiosus and ischio cavernosus muscles are responsible for rhythmic forceful expulsion of sperm at the urethral meatus. SMC, smooth muscle cells; VD, vas deferens; SV, seminal vesicle; Pr, prostate; BSM, bulbo spongiosus muscle; SGE, spinal generator of ejaculation.

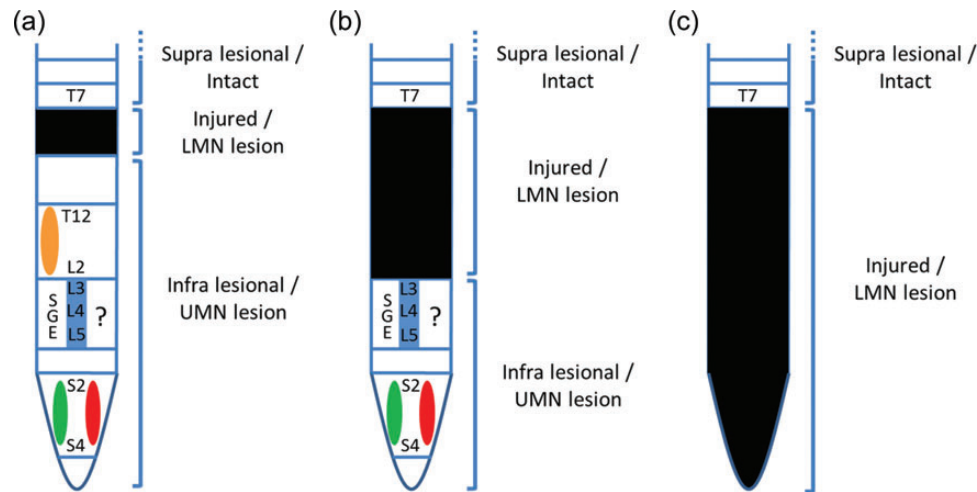

**Figure 2** Three spinal cord injuries (SCI) with the same upper limit (T8) but with different lower limits: (a) T9; (b) L2 and (c) S5. SGE, putative spinal generator of ejaculation; T12-L2, sympathetic ejaculation centres; S2–S4, parasympathetic and somatic ejaculation centres. LMN, lower motor neuron lesion (at the level of injury)/UMN, upper motor neuron lesion (below the injury).

Franchébois, 1952; Rose, 1953). Accordingly, the most likely location for the sympathetic ejaculation centres in humans is between T12 and L2. Onuf's nucleus, which contains the cell bodies of the motoneurons and innervates the pelvipereineal striated muscles including the bulbospongiosus and ischiocavernosus muscles, is located in the ventral horn of the S2–S4 segments (Onufrowicz, 1899; Dejerine, 1914; Chapelle et al., 1985; Schroder, 1985).

SCI impairs motor, sensory and autonomic functions. Three classifications have been successively proposed to characterize the SCI: Frankel's classification (Frankel et al., 1969), the University of Miami Neurospinal Index (UMNI; Klose et al., 1980) and the American Spinal Injury Association Impairment Scale (AIS; Kirshblum et al., 2011) which is the most widely used. Each classification provides two different kinds of information: (i) the most cranial injured segment for Frankel's classification and

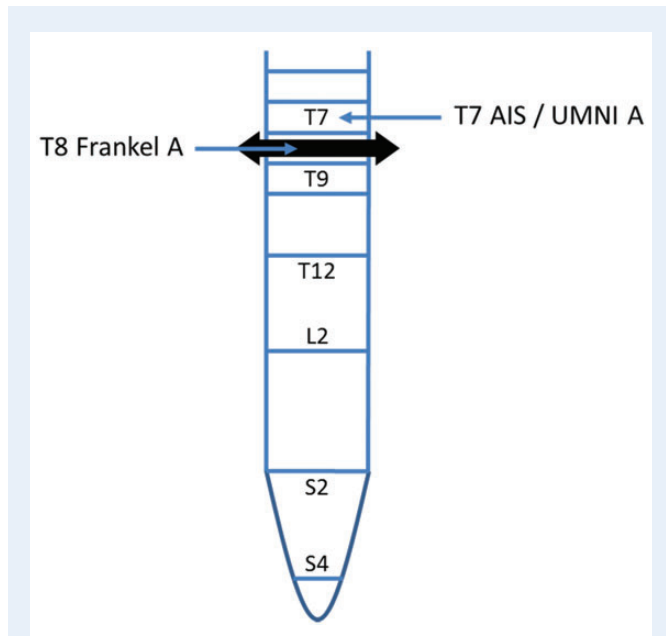

**Figure 3** Complete SCI with an upper limit at T8. Comparison between the three SCI classifications: ASIA Impairment Scale (AIS), UMNI and Frankel. T7 AIS = T7 UMNI = T8 Frankel. Letter A indicates complete motor and sensory injury.

the most caudal intact segment for the UMNI and AIS classifications (Fig. 3) and (ii) the degree of impairment of motor and sensory functions below the lesion ranked using letters from A to E with A = complete motor and sensory injury, B = complete motor but incomplete sensory injury, C/D = incomplete motor and sensory injury and E = normal motor and sensory functions.

The innervation of somatic motor effectors is under the control of the cortico-spinal tract and is constituted of two successive motor neurons. The upper motor neurons (UMN) originate in motor regions of the frontal cortex. Their axons are located in the white matter of the spinal cord. The UMN synapse with lower motor neurons (LMN) in the anterior horn of each spinal segment. Above the level of the lesion, the spinal cord is intact with normal motor and sensory function. At the level of the lesion, the grey matter is damaged (LMN lesion) and voluntary and reflex striated muscle contractions are abolished. In addition, the white matter in which UMN axons travel is also damaged (UMN lesion). Thus, below the level of the lesion, LMN remain uninjured but are disconnected from UMN and pathways of supraspinal origin. Voluntary muscle contractions are abolished but reflex muscle contractions can still occur, especially in response to nociceptive stimuli (Giovannelli Barilari and Kuypers, 1969; Kostyuk et al., 1971; Faganel and Dimitrijevic, 1982).

The three SCI classifications mentioned above have limitations in that they only specify the upper limit of the lesion and its degree of completeness. However, neither the lower limit of the lesion nor the functional status of spinal segments below the lesion are documented. For instance, in the case of an SCI patient classified T7 AIS A, equivalent to T7 UMNI A or T8 Frankel A, the lesion could actually extend from T8 to

- (ii) L2, thus causing direct lesions of the sympathetic ejaculation centres, but the parasympathetic and somatic ejaculation centres would be infralesional (Fig. 2b) or
- (iii) S5 causing lesions of the autonomic and somatic ejaculation centres (Fig. 2c).

The lower limit of the lesion can be estimated based on the testing of spinal reflex arcs relative to motor metamerization (Grossiord et al., 1963; Chapelle et al., 1983b; Previnaire et al., 2009; Fig. 4). Accordingly, careful physical examination provides crucial information regarding the extent of the SCI.

Even though normal ejaculation, i.e. rhythmic forceful ejaculation is often abolished, ejaculation can still occur in response to peripheral stimulation in complete SCI patients (Brackett, 1999; Fode et al., 2012). This means that normal ejaculation can be elicited when there is a complete disruption of the connections between the brain and the spinal centres which control ejaculation. In other words, coordination between the autonomic and somatic spinal centres which control emission and expulsion can still occur without any supraspinal input. This leads to the hypothesis that an SGE might also exist in humans. In rats, the lower limit of sympathetic ejaculation centres is in the L2 segment, as in humans, and the SGE is located within the L3 and L4 segments. The upper limit of parasympathetic and somatic ejaculation centres is in the L6 segment in rats. The L6 segment in rats corresponds to S1 in humans due to a difference in metamerization between species (Fig. 1). The upper limit for the parasympathetic and somatic ejaculation centres is more caudal in humans, i.e. S2. By considering interspecies differences, we hypothesize that a putative SGE in man should be located between the L3 and L5 segments.

After SCI, most men cannot achieve ejaculation during masturbation or coitus. In a significant number of these patients, the application of supraphysiological peripheral stimulation by penile vibratory stimulation (PVS) on the glans penis can elicit ejaculation. PVS thus represents the first-line method for sperm retrieval in SCI patients with anejaculation. In the case of failure, spermatozoa are sometimes collected by electroejaculation (EEJ) using a rectal probe or are surgically retrieved from the epididymis or the testis (Brackett et al., 2010b). Penile stimulation during masturbation, coitus or PVS recruits a reflex arc at the spinal cord level and therefore involves the spinal ejaculation centres. In contrast, during EEJ, the electric current directly stimulates peripheral nerves in the vicinity of the anterior rectal wall as well as the seminal vesicles and smooth muscle fibres of the prostate. Even though a similar pattern of activation of the smooth and striated urethral sphincters has been reported during PVS and EEJ-induced ejaculation (Sonksen et al., 2001), ejaculation during EEJ does not solely rely on the recruitment of intraspinal pathways. On demand pharmacological treatment can improve the occurrence of ejaculation in SCI patients with anejaculation. Guttmann (1949) first reported the use of the acetylcholinesterase (AChE) inhibitor prostigmine delivered intrathecally (i.t.) to elicit ejaculation in SCI men. The use of prostigmine was then stopped because of potential lethal adverse effects, i.e. severe autonomic dysreflexia (AD). Subcutaneous (s.c.) delivery of another AChE inhibitor, physostigmine, was then used in SCI patients to facilitate ejaculation induced by masturbation (Chapelle, 1979). The use of this compound was then also stopped because of potential severe AD. Midodrine, an  $\alpha$ 1-adrenergic receptor agonist registered for the treatment of orthostatic hypotension (Lossnitzer and Letzel, 1983; Wright et al., 1998), increases the rate of

- (i) T9, thus autonomic and somatic ejaculation centres would be infralesional (Fig. 2a) or

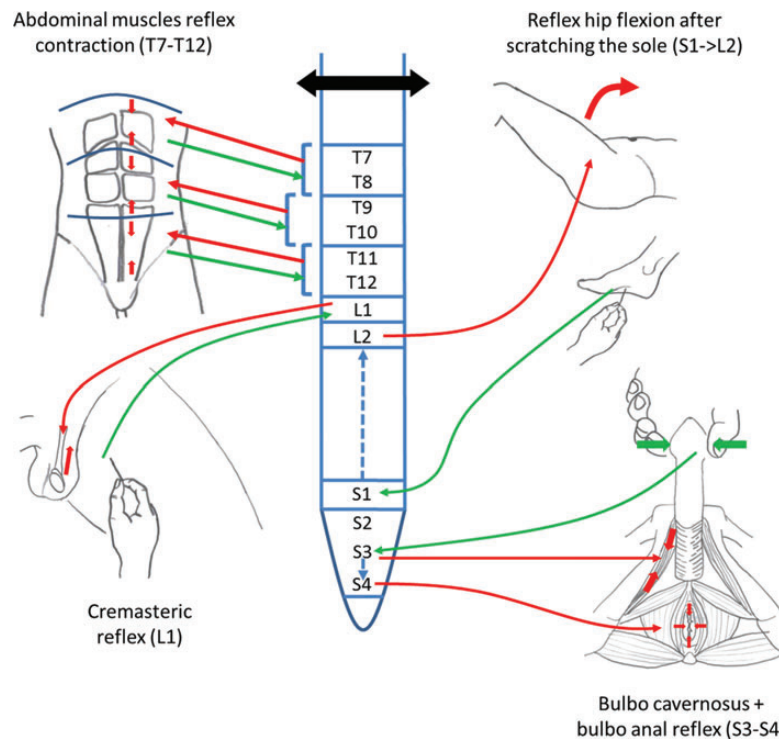

**Figure 4** Sacral, lumbar and thoracic testing of spinal reflex arcs relative to motor metamerization to determine the lower limit of the injury (green, sensory afferents; red, motor efferents) in the case of complete SCI. Pinching or pricking upper, intermediate or lower abdominal skin elicits abdominal muscles contraction (segments T7–T8, T9–T10 and T11–T12). Scratching the skin of the upper thigh (dermatome L1) elicits cremasteric muscle contraction and elevation of the testis (segment L1). Nociceptive stimulation of the sole of the foot (dermatome and segment S1) elicits RHF (segment L2). Pricking or pinching penile glans (dermatome S3) elicits ischio cavernosus muscle (segment S3) and external anal sphincter (segment S4) contraction.

ejaculation in SCI patients when combined with PVS (Soler *et al.*, 2008). Accordingly, on demand midodrine prior to PVS should be tested in the case of anejaculation due to SCI when PVS alone has failed.

The aim of this systematic review was to study male ejaculation capacity following SCI in the light of recent progress in the knowledge of the physiology of ejaculation, and to focus on spinal cord circuitry. We particularly wished to gather data supporting the existence of an SGE in human. In order to achieve this, we examined ejaculation occurrence as a function of different features of SCI, i.e. whether spinal ejaculation centres were (i) supra lesional (located above the level of the injury) therefore intact (ii) injured (UMN lesion) or (iii) infra lesional (located below the level of the injury: LMN lesion; Fig. 2). In other words, we aimed to investigate how much ejaculation is impaired in the case of lesions of the sympathetic (T12–L2) and/or parasympathetic and somatic ejaculation centres (S2–S4) and/or the L3–L5 segments in which the putative SGE is located.

## Methods

### Eligibility criteria

All original articles published in peer-reviewed journals specifying, in SCI adult men, the occurrence of antegrade rhythmic forceful or dribbling ejaculation (primary criterion) as a function of the neurological characterization of the lesion (secondary criterion) were retrieved.

### Search strategy

Bibliographic searches were conducted using the following databases: MEDLINE (October 1964 to November 2012), EMBASE (October 1964 to November 2012), EBSCOhost (August 1955 to November 2012) and the Cochrane Library (September 1967 to November 2012). Searches were carried out using the following terms: (((‘Ejaculation’[Mesh]) OR (‘Fertility’[Mesh])) AND ((‘Spinal Cord Injuries’[Mesh]) OR (‘Paraplegia’[Mesh]) OR (‘Quadriplegia’[Mesh]))).

### Selection criteria

In order for a study to be included in the systematic review, the article had to provide minimal details regarding the SCI, either the upper limit of the lesion or data regarding the evaluation of somatic spinal reflex arcs (Fig. 4). The exclusion criteria were as follows:

- (i) Evaluation of ejaculation elicited by EEJ.
- (ii) Inability for the reader to discriminate between ejaculation and climax because of not enough data being provided.

### Data extraction

The following data were noted for each patient group or individual when available:

- (i) Study design and characteristics
- (ii) Patient characteristics: age, duration of SCI
- (iii) Sexual function prior to SCI
- (iv) Completeness of the lesion



- (v) Level of the lesion
- (vi) Evaluation of somatic spinal reflex arcs
- (vii) Stimulation procedures used to elicit ejaculation
- (viii) Rate of ejaculation
- (ix) Characterization of ejaculation: rhythmic forceful or dribbling.

## Data synthesis

Studies were initially grouped according to the procedure used to elicit ejaculation and mean ejaculation rates were calculated accordingly. For PVS, ejaculation rates were compared between studies using optimal settings, i.e. an amplitude of 2.5 mm and a frequency of 100 Hz (Sonksen et al., 1994) and studies using other settings. An impact of the duration of SCI on the ejaculation rate has been assessed.

Self-reported data from the patient about ejaculation are less accurate than ejaculation elicited in laboratory conditions in the presence of an investigator. Indeed, patients are prone to confuse semen with urine leaks or secretions from bulbo-urethral glands which precede ejaculation. Therefore, in order to provide reliable data, we also reduced the selection of articles in which ejaculation was elicited in laboratory conditions, documented by an investigator, when studying ejaculation rates as a function of the lesional status of the spinal segments.

Reference ejaculation rates were first calculated in patients (i) with complete lesions of the T12–S5 segments and (ii) with lesions strictly located above T12. The reference rates were then compared between lesion levels: T12–L2, L3–L5 and S2–S4 in order to confirm the importance of the T12–L2 and S2–S4 segments in ejaculation and to explore the role of the L3–L5 segments.

Finally, in order to specifically investigate the hypothesis of an SGE located between the L3 and L5 segments, we controlled for the lesional status of known spinal ejaculation centres to determine whether lesions of these segments lowered the ejaculation rate.

## Statistical analysis

Ejaculation rates were reported with their corresponding binomial 95% confidence interval and compared using a  $\chi^2$  test or Fisher's exact test when appropriate. Meta-analyses were performed to estimate the reference ejaculation rates for each procedure used to elicit ejaculation. Pooled estimates were calculated using random effect models in view of the heterogeneity between the observational studies included in the present review; estimates in subgroups, where the completeness or extent of the injury were controlled, were calculated under the fixed-effect assumption (using sample size weights). The impact of the duration of SCI on ejaculation was assessed using (i) an inverse variance weighted linear regression for grouped data and (ii) a logistic regression for individual data. The simultaneous effect of concurrent lesions of different spinal segments was assessed by means of a stratified bivariate analysis. Statistical tests were performed at the 0.05 significance level. All statistical analyses were performed using the Stata 12.0 software (College Station, TX, USA).

## Results

### Identification

The search strategy yielded 513 publications but 474 were excluded (Fig. 5). Thus 39 articles were identified from the databases and 10 additional studies were identified following cross-checking of references in the selected articles. There were three articles further excluded because cohorts of included patients were the same as in another publication (Comarr, 1971; Sonksen et al., 1994; Courtois et al., 2011) and

one was excluded because the cohort was enlarged in a later publication (Brackett et al., 2007b). Therefore 45 articles were finally included.

## Qualitative synthesis of studies included

Data from the 45 selected articles are summarized in Tables I–III. Data for ejaculation in 3851 SCI patients were pooled together. Patient characteristics and data retrieved from each study were very heterogeneous. There were 40 articles were about sexual function or fertility in SCI patients (Horne et al., 1948; Munro et al., 1948; Zeitlin et al., 1957; Bors and Comarr, 1960; Money, 1960; Comarr, 1970; Guttmann and Walsh, 1971; Jackson, 1972; Piera, 1973; Fitzpatrick, 1974; David et al., 1977; Comarr and Vigue, 1978; Grossiord et al., 1978; Francois et al., 1980; Brindley, 1981; Chapelle et al., 1982; 1983a, Francois et al., 1983; Sjogren and Egberg, 1983; Brindley, 1984; Sarkarati et al., 1987; Chapelle et al., 1988; Beretta et al., 1989; Slot et al., 1989; Szasz and Carpenter, 1989; Oates, 1990; Rawicki and Hill, 1991; Alexander et al., 1993; Egon et al., 1994; Nehra et al., 1996; Ohl et al., 1996; Denys et al., 1998; Bird et al., 2001; Sonksen, 2003; Hamid et al., 2006; Soler et al., 2007; Tas et al., 2007; Courtois et al., 2008; Brackett et al., 2010a; Soler et al., 2011). A further three articles dealt with hormonal or testicular function (Morley et al., 1979; Chapelle et al., 1993; Odum et al., 1995), one article was about emotional feelings (Hohmann, 1966) and another one article was about the function of the infra lesional spinal cord segments (Kuhn, 1950). These 45 articles were included in the quantitative synthesis (Moher et al., 2009). Sample sizes ranged from 5 to 529 patients with a median of 44 patients. All but nine studies were retrospective and five studies were multi-centre (with up to three centres). As there was no cohort study, the longitudinal evaluation of the ejaculation rate over time for a similar group of patients was not available. Sexual function prior to SCI was specified in four studies ( $n = 98$ ; Money, 1960; Hohmann, 1966; Sjogren and Egberg, 1983; Alexander et al., 1993) and each time characterized as normal.

Another source of heterogeneity came from the methods used for sperm retrieval since practices have changed between 1948 and 2012. The ejaculation rate during masturbation or coitus without the aid of medications or devices was specified in 28 studies (Table I), elicited by PVS in 21 studies (Table II) and after masturbation following i.t. prostigmine (0.25 to 1.5 mg), in 2 studies or s.c. physostigmine (1–2 mg) in 5 studies (Table III). Settings of the device used to perform PVS were in accordance with optimal settings (amplitude 2.5 mm, frequency 100 Hz; Sonksen et al., 1994) in 10 studies. Patients were treated with midodrine (5–30 mg) prior to PVS in two studies.

Reliability of data about the occurrence of ejaculation and characterization of ejaculation as rhythmic forceful or dribbling depended on the method used to obtain ejaculation. Ejaculation during masturbation or coitus without the aid of medications or devices occurred in laboratory conditions documented by an investigator in five studies and was self-reported by the patients in 23 studies. Ejaculation elicited by PVS or masturbation following i.t. prostigmine or s.c. physostigmine always occurred in laboratory conditions. There were 42 studies which specified the upper limit of the SCI. Regarding SCI classification, the AIS was used in 12 studies, the UMNI in 2 studies, the Frankel's classification in 21 studies and in 1 study the classification was not specified. Individual patient data were provided in 13 studies. In 30 studies, data were calculated from subgroups of patients as a function of the upper limit of the SCI. The methods used to group patients differed between studies,

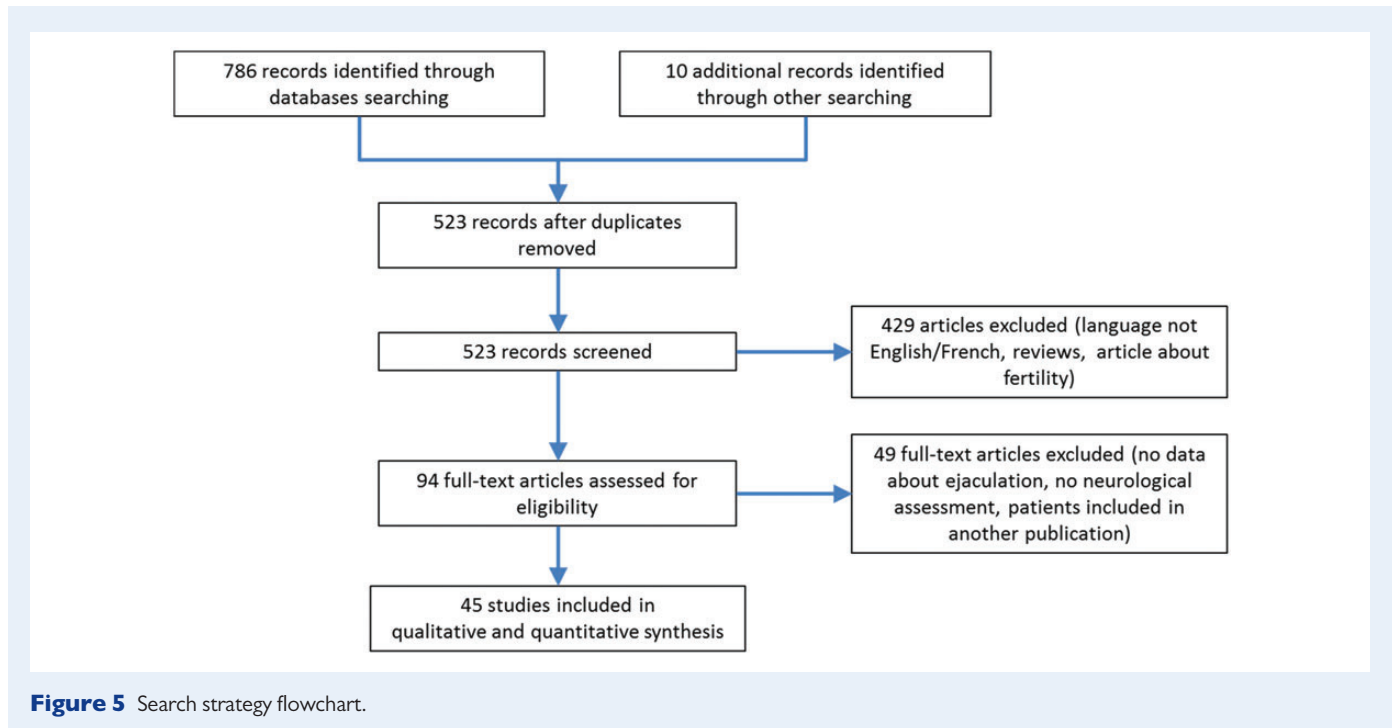

thus little data could be used to assess the ejaculation rate as a function of the location of the lesion. Spinal reflex arcs were tested in 18 studies. The spinal segments tested were T6, T10 or T12 to S5 in 3 studies, S2–S4 in 11 studies, S1–L2 in 4 studies, L1 in 1 study and T12–L2 in 1 study. Only 4 studies specified the evaluation of the spinal reflex arcs of each segment. Ejaculation was specified as rhythmic forceful or dribbling in nine studies.

### Overall ejaculation rates according to the type of stimulation

Ejaculation rates were obtained from all patients, i.e. with a complete or incomplete lesion, whatever the location of the lesion.

There were 28 articles which provided data about ejaculation during masturbation or coitus without the aid of medications or devices (Table I). Ejaculation was elicited in laboratory conditions in five of these studies (Horne *et al.*, 1948; Francois *et al.*, 1983; Alexander *et al.*, 1993; Courtois *et al.*, 2008; Brackett *et al.*, 2010a; Fig. 6). During masturbation or coitus, the overall ejaculation rate was 16.0% (CI 2.5–19.5). It was 11.8% ( $n = 1161$ , CI 10.1–13.8) in patients with complete SCI (Horne *et al.*, 1948; Munro *et al.*, 1948; Kuhn, 1950; Bors and Comarr, 1960; Money, 1960; Hohmann, 1966; Comarr, 1970; David *et al.*, 1977; Comarr and Vigue, 1978; Grossiord *et al.*, 1978; Brindley, 1981; Chapelle *et al.*, 1982; Francois *et al.*, 1983; Sjogren and Egberg, 1983; Slot *et al.*, 1989; Alexander *et al.*, 1993; Denys *et al.*, 1998) and 33.2% ( $n = 343$ , CI 28.5–38.4) in patients with incomplete SCI ( $P < 0.001$ ; Horne *et al.*, 1948; Munro *et al.*, 1948; Bors and Comarr, 1960; Comarr, 1970; David *et al.*, 1977; Comarr and Vigue, 1978; Brindley, 1981; Francois *et al.*, 1983; Slot *et al.*, 1989; Alexander *et al.*, 1993; Denys *et al.*, 1998). For the remaining 1005 patients, the ejaculation rate according to the completeness of the injury was not specified (Zeitlin *et al.*, 1957; Jackson, 1972; Fitzpatrick, 1974; Morley *et al.*,

1979; Francois *et al.*, 1980; Brindley, 1984; Beretta *et al.*, 1989; Rawicki and Hill, 1991; Tas *et al.*, 2007; Courtois *et al.*, 2008; Brackett *et al.*, 2010a).

There were 21 articles which provided data about ejaculation elicited by PVS (Table II). PVS has always been used as a first-line treatment after the failure of masturbation or coitus without the aid of medications or devices. The overall ejaculation rate with PVS was 52.1% (CI 45.3–58.9; Fig. 7). It was 47.4% ( $n = 597$ , CI 43.4–51.4) in patients with complete SCI (Piera, 1973; Francois *et al.*, 1980; Brindley, 1981; Francois *et al.*, 1983; Brindley, 1984; Beretta *et al.*, 1989; Szasz and Carpenter, 1989; Egon *et al.*, 1994; Odum *et al.*, 1995; Ohl *et al.*, 1996; Hamid *et al.*, 2006; Soler *et al.*, 2007) and 52.8% ( $n = 305$ , CI 47.2–58.3) in patients with incomplete SCI ( $P = 0.14$ ; Piera, 1973; Francois *et al.*, 1980; Brindley, 1981; Francois *et al.*, 1983; Brindley, 1984; Beretta *et al.*, 1989; Szasz and Carpenter, 1989; Egon *et al.*, 1994; Odum *et al.*, 1995; Ohl *et al.*, 1996; Hamid *et al.*, 2006; Soler *et al.*, 2007). For the remaining 1009 patients, the ejaculation rate according to the completeness of the injury was not specified (Sarkarati *et al.*, 1987; Oates, 1990; Rawicki and Hill, 1991; Nehra *et al.*, 1996; Bird *et al.*, 2001; Sonksen, 2003; Soler *et al.*, 2007; Courtois *et al.*, 2008; Brackett *et al.*, 2010a).

There were seven articles which provided data about ejaculation in response to masturbation following i.t. prostigmine or s.c. physostigmine (Table III). In five studies, i.t. prostigmine or s.c. physostigmine was used after failure of masturbation or coitus without the aid of medications or devices, with an overall ejaculation rate of 57.1% (CI 51.6–62.5; Fig. 8a). This rate was 54.7% ( $n = 309$ , CI 49.1–60.2) in patients with complete SCI (Guttmann and Walsh, 1971; Grossiord *et al.*, 1978; Chapelle *et al.*, 1983a, 1988, 1993) and 78.1% ( $n = 32$ , CI 61–89.3) in patients with incomplete SCI ( $P = 0.014$ ; Guttmann and Walsh, 1971). In two studies, physostigmine was used after PVS failure with an ejaculation rate of 37.6% (CI 7.4–67.8; Fig. 8b). This rate was 17.9% ( $n = 56$ , CI 9.8–30) in patients with complete SCI (Piera, 1973) and

**Table 1** Ejaculation elicited by masturbation or coitus, without the aid of medications or devices.

| First author/country      | Age: mean/<br>range (years) | SCI<br>classification/<br>individual data | Testing of<br>spinal reflex<br>arcs | Duration of<br>SCI: mean/<br>range (years) | n of patients | c/i SCI | Ejaculation<br>in c/i SCI<br>patients | Data source          | Rhythmic<br>forceful/<br>dribbling |
|---------------------------|-----------------------------|-------------------------------------------|-------------------------------------|--------------------------------------------|---------------|---------|---------------------------------------|----------------------|------------------------------------|
| Munro, 1948/USA           | unk/31–40                   | Frankel/no                                | nt                                  | unk                                        | 82            | 47/35   | 3/5                                   | Self-reported        | unk                                |
| Horne, 1948/USA           | 27/21–35                    | Frankel/yes                               | nt                                  | 3.9/0.75–6                                 | 18            | 10/8    | 1/2                                   | Laboratory condition | unk                                |
| Kuhn, 1950/USA            | unk                         | Frankel/yes                               | S2–S4/L1                            | unk/2–unk                                  | 25            | 25/0    | 2                                     | Self-reported        | unk                                |
| Zeitlin, 1957/USA         | 35/21–68                    | Frankel/no                                | nt                                  | 6/1–38                                     | 100           | unk     | 3 (nd)                                | Self-reported        | RF = 3<br>Dr = 0                   |
| Money, 1960/USA           | 30.4/18–66                  | Frankel/yes                               | nt                                  | 3.6/0.2–16                                 | 14            | 14/0    | 0                                     | Self-reported        | 0                                  |
| Bors, 1960/USA            | unk                         | Frankel/no                                | S2–S4                               | unk                                        | 529           | 396/133 | 34/46                                 | Self-reported        | unk                                |
| Hohmann, 1966/USA         | 36/27–47                    | Frankel/yes                               | nt                                  | 11/2–17                                    | 25            | 25/0    | 3                                     | Self-reported        | unk                                |
| Comarr, 1970/USA          | unk/19–74                   | Frankel/no                                | S2–S4                               | unk/0.3–25                                 | 150           | 108/42  | 6/10                                  | Self-reported        | RF = 10<br>Dr = 6                  |
| Jackson, 1972/Canada      | unk                         | Frankel/no                                | nt                                  | 10.7/1–29                                  | 20            | unk     | 7 (nd)                                | Self-reported        | unk                                |
| Fitzpatrick, 1974/USA     | 28/18–42                    | ASIA/yes                                  | nt                                  | unk                                        | 12            | unk     | 6 (nd)                                | Self-reported        | unk                                |
| David, 1977/Israël        | unk/18–33                   | Frankel/no                                | S2–S4                               | unk                                        | 16            | 13/3    | 1/3                                   | Self-reported        | RF = 4                             |
| Comarr, 1978/USA          | unk                         | Frankel/no                                | S2–S4                               | unk/0.1–26                                 | 153           | 109/44  | 2/18                                  | Self-reported        | unk                                |
| Grossiord, 1978/France    | unk/18–50                   | Frankel/yes                               | Each segment                        | unk/0.5–unk                                | 113           | 113/0   | 31                                    | Self-reported        | unk                                |
| Morley, 1979/South Africa | 33.5/19–70                  | Frankel/no                                | nt                                  | 9/1–23                                     | 18            | unk     | 6 (nd)                                | Self-reported        | unk                                |
| Francois, 1980/France     | 25/16–46                    | Frankel/no data                           | nt                                  | 5/0.5–18                                   | 50            | 33/17   | 8 (nd)                                | Self-reported        | unk                                |
| Brindley, 1981/UK         | 35.2/21–44                  | Frankel/yes                               | S2–S4                               | 6.2/1–15                                   | 9             | 7/2     | 1/0                                   | Self-reported        | RF = 1                             |
| Chapelle, 1982/France     | unk/18–50                   | Frankel/no                                | nt                                  | unk/0.5–unk                                | 149           | 149/0   | 39                                    | Self-reported        | unk                                |
| Francois, 1983/France     | unk                         | Frankel/no                                | nt                                  | unk                                        | 140           | 87/53   | 1/15                                  | Laboratory condition | unk                                |
| Sjogren, 1983/Sweden      | 27/unk                      | ASIA/no                                   | nt                                  | 3/1–unk                                    | 21            | 21/0    | 7                                     | Self-reported        | unk                                |
| Brindley, 1984/UK         | unk                         | Frankel/no data                           | nt                                  | unk/0.5–unk                                | 81            | unk     | 3 (nd)                                | Self-reported        | unk                                |
| Beretta, 1989/Italia      | 25.6/unk                    | Frankel/no data                           | nt                                  | 6.1/unk                                    | 72            | 30/42   | 5 (nd)                                | Self-reported        | unk                                |
| Slot, 1989/Danemark       | 27.5/20–63                  | ASIA/no                                   | nt                                  | unk                                        | 38            | 27/11   | 9/9                                   | Self-reported        | unk                                |
| Rawicki, 1991/Australia   | unk                         | Frankel/no                                | nt                                  | unk                                        | 35            | unk     | 4 (nd)                                | Self-reported        | unk                                |
| Alexander, 1993/USA       | 26/18–70                    | ASIA/no                                   | nt                                  | 3.1/0.4–22                                 | 38            | 28/10   | 4/5                                   | Laboratory condition | RF = 2<br>Dr = 7                   |
| Denys, 1998/France        | 35.8/29–48                  | Frankel/yes                               | S2–S4                               | unk                                        | 5             | 3/2     | 0/1                                   | Self-reported        | unk                                |
| Tas, 2007/Turkey          | 34.1/21–53                  | ASIA/no                                   | nt                                  | 2.2/0.3–10.58                              | 15            | unk     | 7                                     | Self-reported        | unk                                |
| Courtois, 2008/Canada     | 34/18–65                    | ASIA/no                                   | nt                                  | 7/0.25–30                                  | 81            | 40/41   | 24 (nd)                               | Laboratory condition | unk                                |
| Brackett, 2010/USA        | 34.1/17–63                  | UMNI/no data                              | nt                                  | 10/unk                                     | 500           | unk     | 43 (nd)                               | Laboratory condition | unk                                |

unk, unknown; nd, not detailed; nt, not tested; RF, rhythmic forceful; Dr, dribbling; c/i, complete/incomplete.



**Table II Ejaculation elicited by PVS.**

| First author/country                 | Age: mean/<br>range (years) | SCI<br>classification/<br>individual data | Testing of spinal reflex<br>arcs | Duration of<br>SCI: mean/<br>range (years) | n of<br>patients | c/i SCI | Ejaculation<br>in c/i SCI<br>patients | Rhythmic<br>forceful/<br>dribbling |
|--------------------------------------|-----------------------------|-------------------------------------------|----------------------------------|--------------------------------------------|------------------|---------|---------------------------------------|------------------------------------|
| Piera, 1973/France                   | unk                         | No data                                   | T10–S5                           | unk                                        | 101              | 68/33   | 12/15                                 | unk                                |
| François, 1980/France                | 25/16–46                    | Frankel/no                                | nt                               | 5/0.5–18                                   | 50               | 33/17   | 22/14                                 | RF = 35<br>Dr = 1                  |
| Brindley, 1981/UK                    | 27.3/18–50                  | Frankel/yes                               | S2–S4                            | 6.5/0.5–25                                 | 21               | 15/6    | 9/3                                   | RF = 12<br>Dr = 0                  |
| François, 1983/France                | unk                         | Frankel/no                                | nt                               | unk                                        | 140              | 87/53   | 48/20                                 | unk                                |
| Brindley, 1984/UK                    | Unk                         | Frankel/no data                           | L2–S1                            | unk/0.5–unk                                | 81               | 57/24   | 36/12                                 | unk                                |
| Sarkarati, 1987/USA                  | unk/16–36                   | Frankel/yes                               | nt                               | 2.1/0.1–13                                 | 34               | 19/15   | 7 (nd)                                | unk                                |
| Szasz, 1989/Canada                   | unk/24–39                   | ASIA/no                                   | nt                               | unk/0.8–23                                 | 35               | 21/14   | 7/4                                   | unk                                |
| Beretta, 1989/Italia                 | 25.6/unk                    | Frankel/no                                | nt                               | 6.1/unk                                    | 102              | 45/57   | 29/36                                 | RF = 54<br>Dr = 11                 |
| Oates, 1990/USA                      | 27.5/18–41                  | unk/no                                    | nt                               | unk                                        | 21               | unk     | 8 (nd)                                | RF = 8<br>Dr = 0                   |
| Rawicki, 1991/Australia              | Unk                         | Frankel/no                                | nt                               | unk                                        | 9                | unk     | 4 (nd)                                | unk                                |
| Egon, 1994 <sup>a</sup> /France      | 30/19–54                    | ASIA/no                                   | T12–L2/S2–S4                     | 6/0.6–16                                   | 52               | 36/16   | 27/7                                  | unk                                |
| Odum, 1995 <sup>a</sup> /Denmark     | 30/21–45                    | ASIA/yes                                  | nt                               | 7/1–29                                     | 12               | 9/3     | 6/1                                   | unk                                |
| Ohl, 1996 <sup>a</sup> /USA          | Unk                         | Frankel/no                                | L2–S1/S2–S4                      | Unk                                        | 34               | 29/5    | 19/3                                  | unk                                |
| Nehra, 1996 <sup>a</sup> /USA        | 26.9/23–40                  | Frankel/no                                | nt                               | Unk                                        | 78               | unk     | 34 (nd)                               | unk                                |
| Bird, 2001 <sup>a</sup> /USA         | 33.3/17.4–48.2              | UMNI/no                                   | L2–S1/S2–S4                      | 10/2–28.8                                  | 123              | unk     | 73 (nd)                               | unk                                |
| Sønsksen, 2003 <sup>a</sup> /Denmark | 28.2/18–44                  | ASIA/no                                   | T6–T12/L2–S1/S2–S4               | 5/0.2–39                                   | 66               | 44/22   | 41 (nd)                               | unk                                |
| Hamid, 2006 <sup>a</sup> /UK         | 35.6/18–56                  | Frankel/no                                | nt                               | 10.4/0.5–27                                | 74               | 41/33   | 14/23                                 | unk                                |
| Soler, 2007 <sup>a,b</sup> /France   | 31.3/unk                    | ASIA/no                                   | nt                               | 5.3/0.4–unk                                | 158              | 118/40  | 70 (nd)                               | unk                                |
| Courtois, 2008 <sup>b</sup> /Canada  | 34/18–65                    | ASIA/no                                   | nt                               | 7/0.25–30                                  | 57               | unk     | 50 (nd)                               | unk                                |
| Brackett, 2010 <sup>a</sup> /USA     | 34.1/17–63                  | UMNI/no                                   | nt                               | 10/unk                                     | 461              | unk     | 249 (nd)                              | unk                                |
| Soler, 2011 <sup>a</sup> /France     | Unk                         | ASIA/no                                   | nt                               | unk/4–20                                   | 202              | 158/44  | 55/23                                 | unk                                |

In all the studies ejaculation occurred in laboratory conditions. unk, unknown; nd, not detailed; nt, not tested; RF, rhythmic forceful; Dr, dribbling; c/i, complete/incomplete; PVS, penile vibratory stimulation.

<sup>a</sup>Settings of the device used to perform PVS in accordance with optimal settings (amplitude 2.5 mm, frequency 100 Hz) as specified by Sønsksen *et al.* (1994).

<sup>b</sup>Midodrine prior to PVS for all patients in Soler (2007) and for 10 patients in Courtois (2008).

**Table III** Ejaculation during masturbation following intrathecal prostigmine or subcutaneous physostigmine.

| First author/<br>country    | Age: mean/<br>range (years) | SCI classification/<br>individual data | Testing of<br>spinal<br>reflex arcs | Duration of<br>SCI: mean/<br>range (years) | n of<br>patients | c/i SCI | Ejaculation<br>in c/i SCI<br>patients | Rhythmic<br>forceful/<br>dribbling |
|-----------------------------|-----------------------------|----------------------------------------|-------------------------------------|--------------------------------------------|------------------|---------|---------------------------------------|------------------------------------|
| Guttman, 1971/<br>UK        | 28/18–42                    | Frankel/no                             | nt                                  | unk                                        | 134              | 102/32  | 53/25                                 | unk                                |
| Piera, 1973/<br>France      | unk                         | unk/no data                            | T10–S5                              | unk                                        | 74               | 56/18   | 10/10                                 | unk                                |
| Grossiord, 1978/<br>France  | unk/18–50                   | Frankel/yes                            | At each<br>segment                  | unk/0.5–unk                                | 30               | 30/0    | 21                                    | RF = 16<br>Dr = 5                  |
| Chapelle, 1983/<br>France   | unk/18–50                   | Upper and lower<br>limit/yes           | At each<br>segment                  | unk/0.5–unk                                | 20               | 20/0    | 9                                     | unk                                |
| Chapelle, 1988/<br>France   | unk/18–47                   | Upper and lower<br>limit/yes           | At each<br>segment                  | unk/0.5–33                                 | 134              | 134/0   | 74                                    | unk                                |
| Rawicki, 1991/<br>Australia | unk                         | Frankel/no                             | nt                                  | unk                                        | 5                | Unk     | 3 (nd)                                | unk                                |
| Chapelle, 1993/<br>France   | unk/25–39                   | Upper and lower<br>limit/yes           | At each<br>segment                  | unk/1–19                                   | 23               | 23/0    | 12                                    | unk                                |

In all the studies ejaculation occurred in laboratory conditions. unk, unknown; nd, not detailed; nt, not tested; RF, rhythmic forceful; Dr, dribbling; c/i, complete/incomplete.

55.6% ( $n = 18$ , CI 33.7–75.5) in patients with incomplete SCI ( $P = 0.004$ ; Piera, 1973). For the remaining five patients, the occurrence of ejaculation according to the completeness of the injury was not specified (Rawicki and Hill, 1991).

**Comparison of ejaculation rates according to the type of stimulation in patients with complete SCI**

The ejaculation rate during masturbation following i.t. prostigmine: 56.1% ( $n = 132$ , CI 47.5–64.2) was significantly higher than during masturbation following s.c. physostigmine: 45.1% ( $n = 233$ , CI 38.8–51.5,  $P = 0.05$ ). After failure of masturbation or coitus, without the aid of medications or devices, the salvage manoeuvre of masturbation following i.t. prostigmine or s.c. physostigmine had a significantly higher ejaculation rate: 54.7% ( $n = 309$ , CI 49.1–60.2) than the salvage manoeuvre of PVS: 45.8% ( $n = 542$ , CI 41.6–50,  $P = 0.013$ ).

The ejaculation rate during masturbation following i.t. prostigmine or s.c. physostigmine was significantly higher when AchE inhibitors were used after failure of masturbation or coitus without the aid of medications or devices: 54.7% ( $n = 309$ , CI 49.1–60.2), than when a first salvage manoeuvre using PVS failed: 17.9% ( $n = 56$ , CI 9.8–30;  $P < 0.0001$ ).

**Comparison of ejaculation rates with PVS as a function of penile vibrator settings in patients with complete SCI**

Optimal vibration parameters have been defined by Sonksen et al. (1994) as 2.5 mm amplitude and a frequency of 100 Hz. The ejaculation rate was 47.2%  $n = 269$ , CI 41.3–53.2) in studies using non-optimal vibration parameters and 44.3% ( $n = 273$ , CI 38.6–50.3,  $P = 0.55$ ) in studies using optimal vibration parameters ( $P = 0.55$ ).

**Impact of the duration of SCI on ejaculation**

According to grouped (Horne et al., 1948; Zeitlin et al., 1957; Money, 1960; Hohmann, 1966; Jackson, 1972; Morley et al., 1979; Francois et al., 1980; Brindley, 1981; Sjogren and Egberg, 1983; Beretta et al., 1989; Alexander et al., 1993; Tas et al., 2007; Courtois et al., 2008; Brackett et al., 2010a) or individual (Money, 1960; Jackson, 1972; Morley et al., 1979; Brindley, 1981) data, the ejaculation rate in response to masturbation or coitus without the aid of medications or devices was not significantly correlated with the duration of SCI ( $\beta = -0.01$ , CI  $-0.04$ – $0.015$ ,  $P = 0.4$  and  $\beta = 0.01$ , CI  $-0.01$ – $0.03$ ,  $P = 0.27$ , respectively). According to grouped (Francois et al., 1980; Brindley, 1981; Sarkarati et al., 1987; Beretta et al., 1989; Egon et al., 1994; Odum et al., 1995; Bird et al., 2001; Sonksen, 2003; Hamid et al., 2006; Soler et al., 2007; Courtois et al., 2008; Brackett et al., 2010a) or individual (Brindley, 1981; Odum et al., 1995) data, the ejaculation rate in response PVS was not significantly correlated with the duration of SCI ( $\beta = -0.01$ , CI  $-0.12$ – $0.1$ ,  $P = 0.89$  and  $\beta = -0.02$ , CI  $-0.11$ – $0.07$ ,  $P = 0.68$ , respectively). An assessment of the impact of the duration of SCI on the ejaculation rate in response to masturbation following i.t. prostigmine or s.c. physostigmine could not be conducted because no data were available.

**Ejaculation rates according to the status of the spinal ejaculation centres in patients with complete SCI**

*T12–S5 segments*

Data were retrieved from six studies (Piera, 1973; Grossiord et al., 1978; Chapelle et al., 1983a; 1988, 1993; Egon et al., 1994). PVS was used in two studies (Piera, 1973; Egon et al., 1994). In this subset of patients the ejaculation rate was 0% ( $n = 21$ , CI 0–13.5) when the lesion extended from T12 to S5 and 73.6% ( $n = 53$ , CI 60.3–83.7) when the T12–S5 segments were infra lesional ( $P < 0.0001$ ). Masturbation

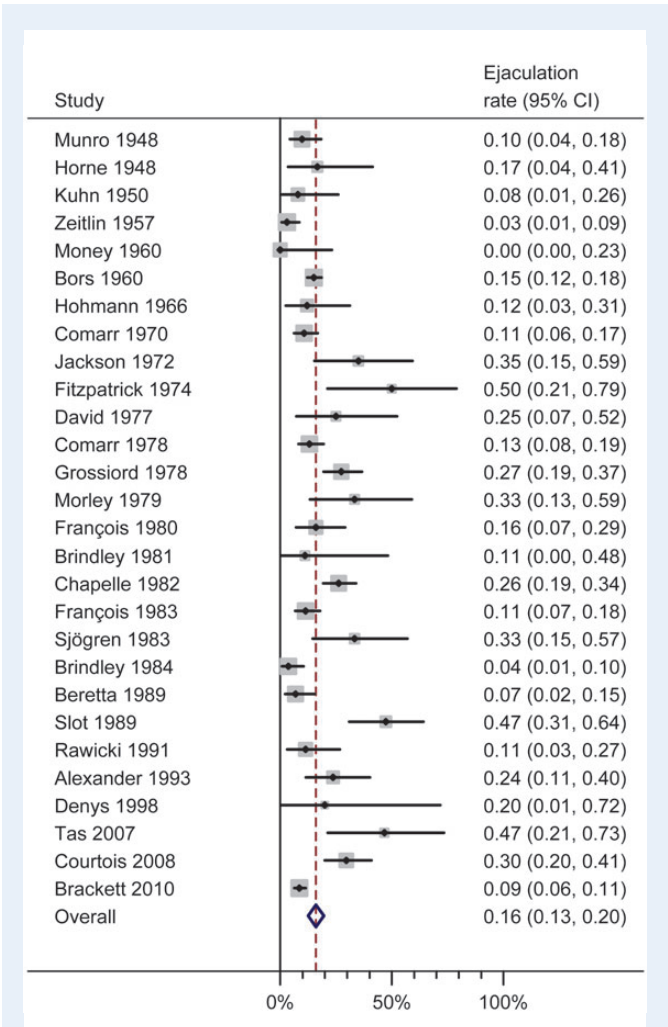

**Figure 6** Ejaculation rate in patients with complete or incomplete SCI in response to masturbation or coitus, without the aid of medications or devices. Grey boxes represent the weight of individual studies and the dashed line represents overall pooled ejaculation rate using a random effect model.

following i.t. prostigmine or s.c. physostigmine in the case of failure of masturbation or coitus without the aid of medications or devices was used in the four remaining studies (Grossiord *et al.*, 1978; Chapelle *et al.*, 1983a; 1988, 1993). In this subset of patients the ejaculation rate was 0% ( $n = 51$ , CI 0–8.4) when the lesions extended from T12 to S5 and 90.8% ( $n = 87$ , CI 82.7–95.5) when the T12–S5 segments were infra lesional ( $P < 0.0001$ ). Masturbation following i.t. prostigmine or s.c. physostigmine in the case of PVS failure was used in one study (Piera, 1973). In this subset of patients the ejaculation rate was 0% ( $n = 16$ , CI 0–22.7) when the lesions extended from T12 to S5 and 81.2% ( $n = 11$ , CI 51.2–96) when the T12–S5 segments were infra lesional ( $P < 0.0001$ ).

**T12–L2 segments**

Data were retrieved from five studies (Grossiord *et al.*, 1978; Chapelle *et al.*, 1983a, 1988, 1993; Egon *et al.*, 1994). PVS was used in one study (Egon *et al.*, 1994). In this subset of patients the ejaculation rate was 0% ( $n = 5$ , CI 0–48.9) when the lesions encompassed the

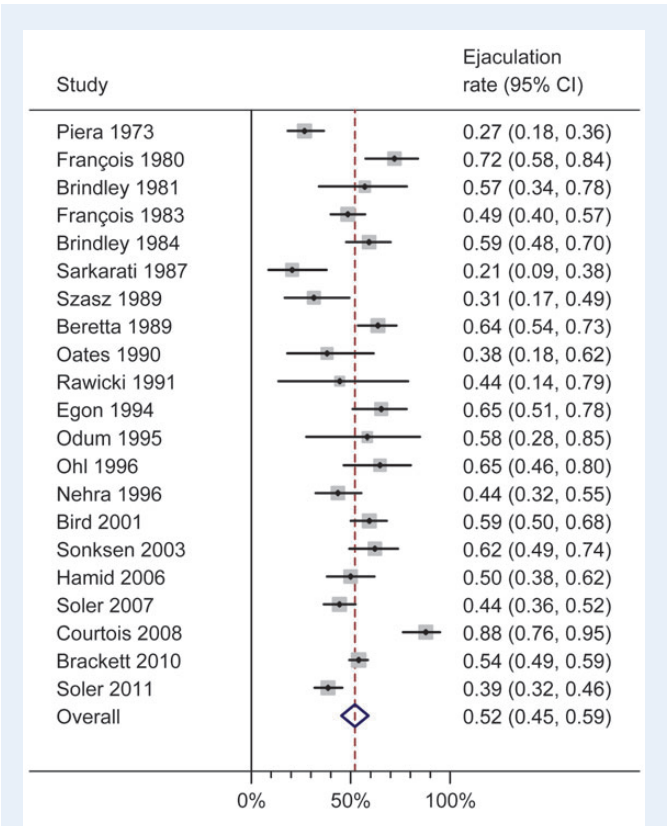

**Figure 7** The ejaculation rate in patients with complete or incomplete SCI elicited by PVS. Grey boxes represent the weight of individual studies and the dashed line represents overall pooled ejaculation rate using a random effect model. PVS, penile vibratory stimulation.

T12–L2 segments and 90% ( $n = 30$ , CI 73.6–97.3) when the T12–L2 segments were infra lesional ( $P < 0.0001$ ). Masturbation following i.t. prostigmine or s.c. physostigmine was used in four studies after failure of masturbation or coitus without the aid of medications or devices (Grossiord *et al.*, 1978; Chapelle *et al.*, 1983a, 1988, 1993). In this subset of patients, the ejaculation rate was 4.9% ( $n = 61$ , CI 1.1–14) when the lesion encompassed the T12–L2 segments and 91% ( $n = 89$ , CI 83–95.6) when the T12–L2 segments were infra lesional ( $P < 0.0001$ ).

**S2–S4 segments**

Data were retrieved from six studies. PVS was used in two studies (Brindley, 1981; Egon *et al.*, 1994). In this subset of patients the ejaculation rate was 0% ( $n = 4$ , CI 0–54.6) when the lesion encompassed the S2–S4 segments and 76.6% ( $n = 47$ , CI 62.6–86.6) when the S2–S4 segments were infra lesional ( $P = 0.006$ ). After failure of masturbation or coitus without the aid of medications or devices, masturbation following i.t. prostigmine or s.c. physostigmine was used in four studies (Grossiord *et al.*, 1978; Chapelle *et al.*, 1983a, 1988, 1993). In this subset of patients the ejaculation rate was 30.8% ( $n = 26$ , CI 16.3–50.2) when the lesion encompassed the S2–S4 segments and 67.3% ( $n = 153$ , CI 59.5–74.3) when the S2–S4 segments were infra lesional ( $P = 0.001$ ).

**Characterization of ejaculation**

The data presented in this review provide additional information about the characterization of ejaculation occurring during PVS or during

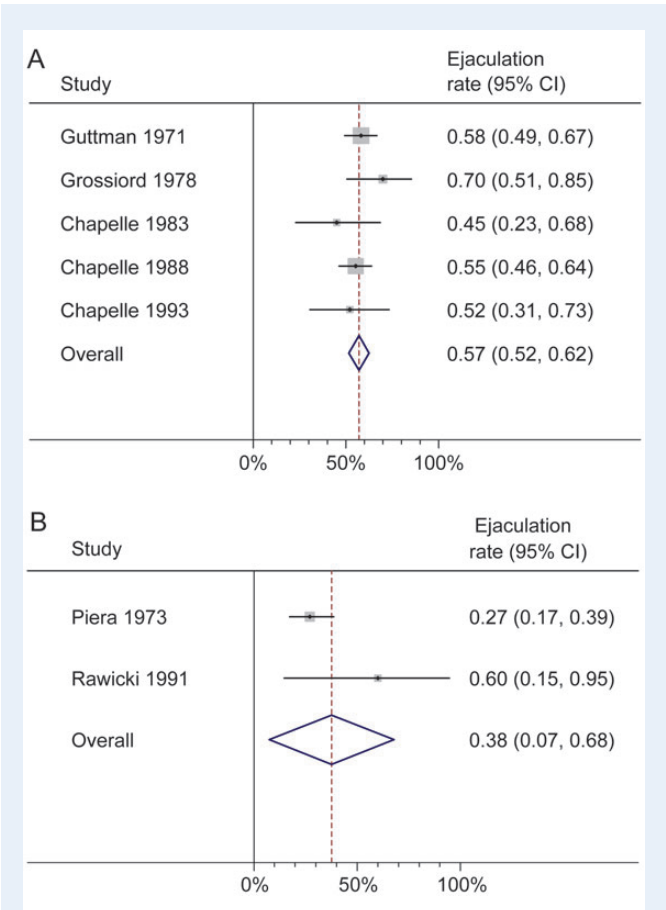

**Figure 8** (a) The ejaculation rate in patients with complete or incomplete SCI during masturbation following intrathecal prostigmine or subcutaneous physostigmine after ejaculation failure of masturbation or coitus, without the aid of medications or devices. Grey boxes represent the weight of individual studies and the dashed line represents the overall ejaculation rate using a random effect model. (b) The ejaculation rate in patients with complete or incomplete SCI during masturbation following intrathecal prostigmine or subcutaneous physostigmine after PVS failure. Grey boxes represent the weight of individual studies and the dashed line represents the overall ejaculation rate using a random effect model. PVS, penile vibratory stimulation.

masturbation following i.t. prostigmine or s.c. physostigmine. Normal ejaculation was described, depending on the authors, as propelled, intermittent pulsatile, saccadic, rhythmic forceful or as prior to SCI. In the case of emission without contribution of the somatic centres, ejaculation was described as quiet emission, dripping or emanation of semen without expulsion or dribbling. In order to simplify, we qualified ejaculation as rhythmic forceful or dribbling.

Characterization of ejaculation as rhythmic forceful or dribbling was provided in nine studies (Zeitlin et al., 1957; Comarr, 1970; David et al., 1977; Grossiord et al., 1978; Francois et al., 1980; Brindley, 1981; Beretta et al., 1989; Oates, 1990; Alexander et al., 1993). Ejaculation occurred during masturbation or coitus without the aid of medications or devices in 5 studies (Zeitlin et al., 1957; Comarr, 1970; David et al., 1977; Brindley, 1981; Alexander et al., 1993) and was self-reported to be rhythmic forceful by 20 patients and dribbling by 17. Ejaculation was

elicited by PVS in 4 studies (Francois et al., 1980; Brindley, 1981; Beretta et al., 1989; Oates, 1990) and was documented by an investigator to be rhythmic forceful in 109 patients and dribbling in 12. Ejaculation occurred during masturbation following i.t. prostigmine in 1 study (Grossiord et al., 1978) and was documented by an investigator to be rhythmic forceful in 16 patients and dribbling in 5.

In response to PVS or masturbation following i.t. prostigmine or s.c. physostigmine, ejaculation was documented by an investigator as rhythmic forceful in 0% ( $n = 5$ , CI 0–48.9) of patients with complete lesion encompassing S2–S4 compared with 97.9% ( $n = 48$ , CI 88.1–100) of patients with a lesion located above S2 ( $P < 0.0001$ ). Similarly, ejaculation was documented by an investigator as rhythmic forceful in 0% ( $n = 4$ , CI 0–54.6) of patients with an upper limit of complete lesion at or below T12 compared with 98.7% ( $n = 74$ , CI 92.1–100) of patients with an upper limit of complete lesion above T12 ( $P < 0.0001$ ).

Assessment of the existence of an SGE

Ejaculation rates as a function of the lesional status of the L2–S1 segments

There were four studies (Brindley, 1984; Ohl et al., 1996; Bird et al., 2001; Sonksen, 2003), which evaluated ejaculation following PVS. Unfortunately, i.t. was not possible to separate the results of patients with incomplete and complete SCI in any of these studies. Reflex hip flexion (RHF; L2) in response to nociceptive stimulation of the sole of the foot (S1) only occurs if the L2–S1 segments are infra lesional. The ejaculation rate was 25% ( $n = 88$ , CI 17.1–35) in patients without RHF and 75% ( $n = 216$ , CI 68.8–80.3) in patients with RHF ( $P < 0.0001$ ).

Ejaculation rates as a function of the lesional status of each spinal segment

In only four studies, the spinal reflex arcs of each segment were tested in order to determine the upper and lower limits of the lesion in complete SCI patients (Grossiord et al., 1978; Chapelle et al., 1983a, 1988, 1993). In these studies masturbation or coitus without the aid of medications or devices failed in all patients. Ejaculation was attempted by masturbation following i.t. prostigmine or s.c. physostigmine and occurred in 56% of patients ( $n = 207$ , CI 49.2–62.6).

By pooling these data, ejaculation rates were calculated depending on the status of each spinal segment, i.e. supra lesional thus intact, injured or infra lesional (Fig. 9). When a segment was intact, all the segments above were by definition intact and the segments below could be intact, injured or infra lesional. When a segment was injured, the segments above could be injured or intact and the segments below could be injured or infra lesional (Fig. 2). When a segment was infra lesional, the segments above could be infra lesional, injured or intact and all the segments below were by definition infra lesional.

Intact lower thoracic and upper lumbar segments were associated with a high probability of ejaculation (Fig. 9a). There was a trend for a maximal ejaculation rate when segment L2 and/or L3 and/or L4 were intact (Fig. 9a). There was no patient with an upper limit of the lesion located below L5. Complete lesion of a spinal segment below T10 was associated with a steep decrease in the ejaculation rate with the lowest rate observed with complete lesion of L3 (Fig. 9b). Considering the infra lesional segments, the more cranial the lower limit of the lesion, the higher the likelihood of ejaculation with a maximum ejaculation rate when L2 and/or above segments were infra lesional (Fig. 9c).



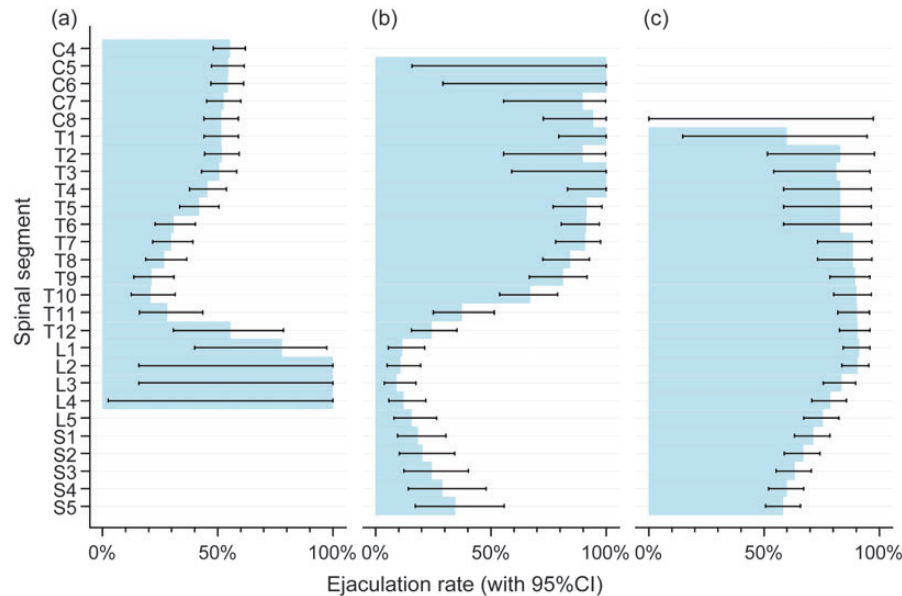

**Figure 9** Ejaculation rates, with 95% confidence intervals, during masturbation following intrathecal prostigmine or subcutaneous physostigmine in patients with complete SCI according to the status of each spinal segment irrespective of the others: (a) supralesional thus intact segment, (b) completely injured segment and (c) infralesional segment.

Bivariate analysis yielded that the ejaculation rate was strongly dependent on the number of T12–L2 segments with complete injury. Ejaculation rates ranged from 86% ( $n = 93$ , CI 77.4–91.8) to 4.9% ( $n = 61$ , CI 1.1–14) depending on the number of completely injured segments between T12 and L2, 0 to 3, respectively ( $P < 0.0001$ ). We therefore performed a stratified bivariate analysis to assess the impact of the lower limit of the lesion on the ejaculation rate, controlling for the number of T12–L2 segments with complete lesions (Table IV). When there was a complete lesion of 0 or 1 of the T12–L2 segments (Groups 0 and 1), the ejaculation rate was significantly lower in patients with a lower limit at L3 or below, than in patients with a lower limit above L3 ( $P < 0.0001$  and  $P = 0.0007$ , respectively). When there were complete lesions of 2 or 3 of the T12–L2 segments (Groups 2 and 3), there was no significant difference in the ejaculation rate between patients with a lower limit at the L3 segment or below compared with those with a lower limit above L3. A stratified bivariate analysis to assess the impact of the upper limit of the lesion on the ejaculation rate, controlling for the number of S2–S4 segments with complete lesions could not be conducted because of the small number of patients with injuries restricted to the lumbo-sacral segments.

The number of patients with complete SCI extending from T12, L1 or L2–L3, L4 or L5 was again too small to compare the ejaculation rates as a function of the lower limit of the lesion. It was thus not possible to correlate ejaculation impairment with the number of L3–L5 segments injured.

## Discussion

Over the last decades, anejaculation in SCI patients has remained a major issue with sexual function being the main problem in these patients (Anderson, 2004; Simpson *et al.*, 2012).

While considerable progress has been achieved regarding sperm retrieval with techniques which have evolved over time, the rate of ejaculation during masturbation or coitus without the aid of medications or devices is still very low, i.e. 16.0% overall, 11.8% in patients with complete and 33.2% in patients with incomplete SCI. These results are in line with ejaculation rates reported in previous reviews (Talbot, 1955; Bors and Comarr, 1960; Tsuji *et al.*, 1961; Uyttendaele *et al.*, 1979; Brackett, 1999; Sonksen and Ohl, 2002). This means that the vast majority of SCI males need assistance to father children or simply to ejaculate for reasons other than procreation (Anderson *et al.*, 2007). The use of PVS to elicit ejaculation and retrieve sperm ex copula increases the rate of ejaculation to 52.1% overall. It appears that PVS-induced ejaculation occurs slightly more easily when the SCI is incomplete (52.8%) compared with complete (47.4%), although this difference was not statistically significant. The ejaculation rate with PVS did not significantly improve with the use of optimal vibration parameters (2.5 mm amplitude, 100 Hz frequency; Sonksen *et al.*, 1994). In the landmark study in 1994 by Sonksen *et al.*, the same group of patients underwent the same PVS procedure with two different amplitudes but at the same frequency. In the 11 selected studies using non-optimal parameters for PVS, there was considerable disparity regarding the vibratory amplitude and frequency, the upper limits and completeness of the lesion, the duration of SCI and the medication at the time of PVS. Therefore, the present results are not in contradiction with Sonksen's data (Sonksen *et al.*, 1994) and may only reflect the difficulties inherent in the comparison of different studies. Prior to the increase in the use of the PVS technique with the development of the Ferticare<sup>R</sup> device, AchE inhibitors, i.e. i.t. prostigmine and s.c. physostigmine were used when patients were unable to ejaculate during masturbation or sexual intercourse. Conversely to prostigmine, which requires i.t. administration to be effective, physostigmine crosses the blood brain barrier allowing s.c. delivery



**Table IV** Ejaculation rates during masturbation after intrathecal prostigmine or subcutaneous physostigmine as a function of the status of the sympathetic centres (rows) and the lower limit of complete SCI (columns).

| Number of segments completely injured between T12 and L2 |                                | Lower limit of SCI |    |    |    |    |    |    |    |    | Total | P value |
|----------------------------------------------------------|--------------------------------|--------------------|----|----|----|----|----|----|----|----|-------|---------|
|                                                          |                                | Above L3           | L3 | L4 | L5 | S1 | S2 | S3 | S4 | S5 |       |         |
| 0 (Group 0)                                              | Patients who ejaculated        | 80                 | 0  | 0  | 0  | 0  | 0  | 0  | 0  | 0  | 80    | <0.001  |
|                                                          | Patients who did not ejaculate | 8                  | 1  | 1  | 0  | 2  | 0  | 1  | 0  | 0  | 13    |         |
|                                                          | Total nb of patients           | 88                 | 1  | 1  | 0  | 2  | 0  | 1  | 0  | 0  | 93    |         |
| 1 (Group 1)                                              | Patients who ejaculated        | 18                 | 0  | 0  | 0  | 0  | 0  | 2  | 0  | 1  | 21    | <0.001  |
|                                                          | Patients who did not ejaculate | 2                  | 0  | 1  | 2  | 1  | 1  | 2  | 0  | 2  | 11    |         |
|                                                          | Total nb of patients           | 20                 | 0  | 1  | 2  | 1  | 1  | 4  | 0  | 3  | 32    |         |
| 2 (Group 2)                                              | Patients who ejaculated        | 1                  | 0  | 0  | 0  | 1  | 0  | 0  | 0  | 2  | 4     | 1       |
|                                                          | Patients who did not ejaculate | 3                  | 1  | 0  | 2  | 0  | 1  | 1  | 0  | 1  | 9     |         |
|                                                          | Total nb of patients           | 4                  | 1  | 0  | 2  | 1  | 1  | 1  | 0  | 3  | 13    |         |
| 3 (Group 3)                                              | Patients who ejaculated        | 2                  | 0  | 0  | 1  | 0  | 0  | 0  | 0  | 0  | 3     | 0.054   |
|                                                          | Patients who did not ejaculate | 7                  | 5  | 4  | 5  | 7  | 6  | 5  | 5  | 14 | 58    |         |
|                                                          | Total nb of patients           | 9                  | 5  | 4  | 6  | 7  | 6  | 5  | 5  | 14 | 61    |         |
| Together                                                 | Patients who ejaculated        | 101                | 0  | 0  | 1  | 1  | 0  | 2  | 0  | 3  | 108   | <0.001  |
|                                                          | Patients who did not ejaculate | 20                 | 7  | 6  | 9  | 10 | 8  | 9  | 5  | 17 | 91    |         |
|                                                          | Total nb of patients           | 121                | 7  | 6  | 10 | 11 | 8  | 11 | 5  | 20 | 199   |         |

The upper limit of complete SCI was segment L3 or above in all patients (Grossiord et al., 1978, Chapelle et al., 1983a, Chapelle et al., 1988, Chapelle et al., 1993). nb, number.

(Bullock et al., 1946; Togashi et al., 1994). In patients with complete SCI, after ejaculation failed to occur during masturbation or coitus without the aid of medications or devices, AchE inhibitors were found to be a more effective salvage manoeuvre than PVS with ejaculation rates of 54.7 versus 45.8%, respectively. In patients with incomplete SCI, AchE inhibitors were also a more effective salvage manoeuvre than PVS with ejaculation rates of 78.1 versus 53.0%, respectively. When AchE inhibitors were used as a second salvage manoeuvre, i.e. after failure of PVS, the ejaculation rate was 37.6% with a greater efficacy in patients with incomplete SCI. Accordingly, AchE inhibitors can be useful for some PVS non-responders. However, neither i.t. prostigmine nor s.c. physostigmine are currently used because of safety issues, particularly AD, as previously mentioned.

The mechanism of action of AchE inhibitors in ejaculation is not well understood. The fact that prostigmine elicits or facilitates ejaculation when delivered it but not systemically (Guttmann, 1949) clearly indicates a spinal rather than peripheral mechanism of action. This view is further supported by experimental data. In rat spinal cord slices, prostigmine activates presynaptic M1 muscarinic subtype receptors that increase the release of noradrenalin and enhance the activity of autonomic preganglionic neurons located in the IML (Takahashi and Buccafusco, 1992; Umeda et al., 2006). Activation of sympathetic and parasympathetic neurons innervating the anatomical structures involved in ejaculation facilitates ejaculation. In addition, AchE inhibitors, which augment Ach bioavailability, may increase cholinergic transmission in a spinal network which integrates sensory, motor and autonomic information. Such a network has been described in the rat comprising cholinergic neurons with cell bodies located around the central canal (lamina X) and terminals in the IML as well as in the dorsal and ventral horns (Navaratnam and Lewis, 1970; Borges and Iversen, 1986). The lamina X cholinergic neurons are most numerous at the lumbar enlargement of the spinal cord in the rat and form clusters of cells with an organization which resembles the SGE (Fig. 1). Whether those neurons are part of the

SGE and whether their activation triggers or facilitates ejaculation remains to be demonstrated. In addition, physostigmine and prostigmine may concomitantly increase the amount of Ach in preganglionic and postganglionic axon terminals (Kwok and Collier, 1982; Brunton et al., 1995). In summary, AchE inhibitors may activate cholinergic pathways, enhancing the activity of sympathetic preganglionic neurons but also upstream, in the medial part of lamina VII and in lamina X of the spinal cord where the SGE is located. This might explain the spontaneous ejaculations which occur following i.t. prostigmine in SCI patients (Guttmann and Walsh, 1971).

One limitation of this systematic review is its relative lack of exhaustiveness. The ejaculation rates in the different types of SCI were only retrieved from articles which provided details of the neurological characterization of the SCI. Nevertheless, because of the rather low variability of the data across the selected studies, it is unlikely that including more articles would have changed the main results of this review.

Another limitation is the lack of assessment of the role of AD in failure of ejaculation whatever the type of stimulation used. Indeed, AD can prevent the achievement of ejaculation. Episodes of AD and the associated increase in blood pressure, which are not usually reported during sexual stimulation (Lindan et al., 1980), are common during sperm retrieval procedures, especially in the case of cervical or high thoracic SCI (McBride et al., 2003; Sheel et al., 2005; Elliott and Krassioukov, 2006; Courtois et al., 2008a; Eklund et al., 2008). In the selected papers, it was not possible to differentiate between failure to ejaculate because of the SCI or because the stimulation had to be stopped because of AD.

Another weakness of this review is the lack of information regarding the concomitant treatments of the SCI patients enrolled in the studies. Centrally acting drugs (Giuliano and Clement, 2012) including the selective serotonin reuptake inhibitors for depression (Waldinger et al., 1998; Giuliano, 2007) and the analgesic tramadol (Bar-Oret et al., 2012; Giuliano, 2012) can delay and sometimes abolish ejaculation. The adrenoceptor blocking agent tamsulosin and more recently silodosin, which are

prescribed off label for bladder sphincter dyssynergia in SCI patients, can be responsible for anejaculation (Hellstrom and Sikka, 2006; Masumori *et al.*, 2009). Intradetrusor botulinum toxin injections for the treatment of neurogenic detrusor overactivity have recently been reported to cause retrograde ejaculation and to decrease total semen volume (Caremél *et al.*, 2012). Conversely, phosphodiesterase type 5 inhibitors often prescribed since 1998 for the treatment of erectile dysfunction in SCI patients have been reported to slightly increase the occurrence of ejaculation during masturbation or coitus without the aid of medications or devices in this population (Giuliano *et al.*, 1999; Giuliano *et al.*, 2007; Giuliano *et al.*, 2008). To summarize, the side effects of medication on ejaculation in SCI patients have not been addressed in the present review because this information was missing from most of the included studies.

In this review, we focused on mechanical, i.e. masturbation, coitus without the aid of medications or devices, or PVS, or pharmacological methods to elicit ejaculation. Although poorly reported, supraspinal stimulation, i.e. erotic thoughts or erotic movie watching can induce psychogenic emission defined as a 'whitish and viscous substance expelled or dribbled (...) but without any peripheral stimulation' (Courtois *et al.*, 1993). If the upper limit of SCI is located below T12, psychogenic emission can occur. Conversely, when elicited by PVS, ejaculation requires at least partial preservation of afferent nerves to convey excitatory stimuli from the glans or perineal region to activate the spinal centres (Talbot, 1949; Bors and Comarr, 1960; Comarr, 1970; Chapelle *et al.*, 1982; Brindley, 1984; Kinsey *et al.*, 1998). Only one report which specifically evaluated the occurrence of psychogenic emission found that almost half of the patients with an upper limit of SCI located below L2, mostly incomplete, were able to have psychogenic emissions which could contain motile spermatozoa. Whether this emission was rhythmic forceful or dribbling was unfortunately not specified (Courtois *et al.*, 1993).

Despite a few optimistic reports (Egon *et al.*, 1994; Lochner-Ernst *et al.*, 1997; Sonksen, 2003), the results of the present systematic review showed that there is still almost a 50% failure rate of PVS to retrieve sperm during antegrade ejaculation. PVS is the only technique which allows intravaginal insemination at home for couples, without any further medical assistance. The possibility of conception, however, also depends on the quality of sperm which is often impaired in SCI patients. The overall rate of pregnancy following self-insemination ranges from 25 to 61% (Dahlberg *et al.*, 1995; Nehra *et al.*, 1996; Lochner-Ernst *et al.*, 1997; Sonksen *et al.*, 1997; Sonksen *et al.*, 2012). If PVS fails or the self-insemination of semen retrieved by PVS is unsuccessful, sperm can be obtained by EEJ or more often by surgical retrieval, and then followed by assisted procreation techniques. After EEJ, intrauterine insemination, IVF or ICSI can be performed whereas after surgical sperm retrieval, IVF or ICSI is mandatory. Overall, EEJ or surgical sperm retrieval appears to be required for more than one-third of SCI patients in order for pregnancy to occur (Dahlberg *et al.*, 1995; Brackett *et al.*, 2010a). Low motility and viability of spermatozoa is a classic feature of sperm from SCI patients (Restelli *et al.*, 2009). This is mostly due to the alteration in the seminal plasma (Brackett *et al.*, 1997), the transportation/storage after sperm retrieval (Ohl *et al.*, 1999) and the immune system changes which occur in SCI patients (Basu *et al.*, 2002; Brackett *et al.*, 2007a). Spermatozoa motility is higher when the SCI is incomplete and if it is located above the spinal ejaculation centres (Chapelle *et al.*, 1993; Odum *et al.*, 1995; Rutkowski *et al.*, 1995; Sonksen *et al.*, 1996). The retrieval method also influences semen quality, which is poorer

when collected by EEJ compared with PVS, whereas the duration of SCI does not seem to exert an influence (Sonksen *et al.*, 1996; Le Chapelain *et al.*, 1998; Kafetsoulis *et al.*, 2006; Iremashvili *et al.*, 2010). Consideration of the quality of sperm in SCI patients is beyond the scope of the present review.

## Ejaculation rates according to the status of the T12–S5 segments

### T12–S5 segments as a whole

In response to PVS or during masturbation following i.t. prostigmine or s.c. physostigmine, the ejaculation rate was (i) 0% in patients with complete lesions of the T12–S5 segments and (ii) 73.6 and 90.8%, respectively when the T12–S5 segments were infralesional. When complete SCI is located above the T12 segment, PVS or pharmacological stimulation combined with masturbation are required for ejaculation because of the loss of supraspinal excitatory influences. This reinforces the concept of a spinal network located within the T12–S5 segments which, when properly stimulated, triggers normal ejaculation despite the lack of brain influences.

### T12–L2 segments

The ejaculation rate in laboratory conditions were dramatically decreased, close to zero, in patients with complete injury of the T12–L2 segments. Conversely, when these segments were infralesional, 9 out of 10 patients were able to ejaculate by using PVS or when masturbation followed i.t. prostigmine or s.c. physostigmine. It is noteworthy that the 90% ejaculation rate in patients with infralesional segments T12–L2 has been obtained from a single study with no more than 30 patients. More data in this subset of patients are warranted. The ejaculation rate during masturbation or coitus without the aid of medications or devices was significantly lower in the case of injury of the T12–L2 segments than when these segments were infralesional (data not shown). These data confirm the necessity for the T12–L2 segments to be infralesional in order for ejaculation to occur.

This is further supported by a report from Chapelle *et al.* (1988) in which three patients with complete SCI extending from the L1 or L2 to S5 segments ejaculated during masturbation following s.c. physostigmine. In these patients, one or two of the T12–L2 segments where the sympathetic ejaculation centres are located were intact. They were thus under supraspinal control, allowing psychogenic stimulation to elicit dribbling ejaculation. The same authors claimed that ejaculation will only be prevented during masturbation following i.t. prostigmine or s.c. physostigmine if at least two of the T12, L1 and L2 segments are damaged (Chapelle *et al.*, 1982).

### S2–S4 segments

The ejaculation rate in laboratory conditions was significantly lower in the case of complete lesions of the S2–S4 segments than when these segments were infralesional. However, this difference was less obvious than when comparing the complete lesion with infralesional location of the T12–L2 segments. Conversely, the ejaculation rate during masturbation or coitus without the aid of medications or devices was higher in the case of lesions of the S2–S4 segments than when these segments were infralesional (data not shown). Such an apparent contradiction between data retrieved in laboratory conditions and self-reported may be explained by the lack of reliability of data self-reported by the

patient. Injury of the S2–S4 segments usually induces more urine leaks because of urinary sphincter hypotonia or atonia. Urine leaks and bulbo urethral glands secretions occurring during sexual stimulation can be confounded with semen by patients (Zeitlin et al., 1957). The results of the present review showed that ejaculation was not rhythmic forceful in any of the five patients with complete injury of the S2–S4 segments. In the four patients with an upper limit of complete SCI at the level of T12 or below, ejaculation was dribbling. All of these four patients had a complete SCI encompassing the S2–S4 segments. This strongly supports and confirms the crucial role of Onuf's nucleus located in these segments in the control of the expulsion phase.

Thus, the present data confirm the key role of (i) the T12–L2 segments in which the sympathetic centres which control emission are located and (ii) the S2–S4 segments in which the parasympathetic and somatic centres are located and command the emission and expulsion phases of ejaculation, respectively. If the T12–L2 segments are supralesional, psychogenic emission can occur. The S2–S4 segments must be infralesional for rhythmic forceful ejaculation to occur in response to any kind of stimulation.

## Assessment of the existence of an SGE

Four studies have highlighted the necessity of the L2–S1 segments to be infralesional for PVS elicited ejaculation to occur (Brindley, 1984; Ohl et al., 1996; Bird et al., 2001; Sonksen, 2003). The status of these segments was assessed by scratching the sole of the foot (SFS, S1 segment) to verify the presence of RHF (RHF, L2 segment). For this polysynaptic reflex to occur, the L2–S1 segments must be at least partially intact since somatic reflexes occur at these levels and the intraspinal pathway is conveyed through the L3, L4 and L5 segments (Faganel and Dimitrijevic, 1982). A quarter of the patients with absent RHF after SFS could ejaculate. The 4 above mentioned studies mostly included patients with incomplete SCI in whom the intraspinal L2 to S1 pathways involved in PVS-elicited ejaculation might not have been completely disrupted. Brindley considered that a spinal reflex arc between L2 and S1 could support the coordinated activation of the sympathetic, parasympathetic and somatic centres and suggested that these segments act as a sacrolumbar intersegmental reflex circuit (Brindley, 1981). We suggest that the L2–S1 segments may well be the location of an SGE in man rather than a simple intersegmental spinal reflex arc.

In rats, the injection of the neurotoxin saporin conjugated to a substance P analogue responsible for a selective lesion of SGE interneurons in laminae X and VII of L3 and L4 resulted in the abolition of ejaculation without impairment of the other components of male sexual behaviour (Truitt and Coolen, 2002). In addition, in rats, selective lesions of the SGE interneurons disrupt the rhythmic bursting of the bulbospongiosus muscle following dorsal penile nerve, urethral or pharmacological stimulation (Staudt et al., 2012). In order to know whether such a neuronal organization also exists in humans, we examined ejaculation occurrence as a function of the location of SCI, focusing on the putative location of an SGE, i.e. the L3–L5 segments.

This hypothesis is based on the location of the SGE in rats, in which the physiology of ejaculation is similar to humans (Giuliano et al., 2010), and accounts for interspecies differences in metamerization. Even though some authors have recently speculated about the existence of an SGE in humans (Alexander and Rosen, 2008; Everaert et al., 2010; Courtois et al., 2011), to our knowledge, such evidence has not been yet provided.

Data available from patients with complete SCI of the sympathetic centres (T12–L2; Grossiord et al., 1978; Chapelle et al., 1983a, 1988, 1993) allowed us to assess the impact of caudal extension of the injury below L2, at the level of the putative SGE (L3–L5). Among the patients with an upper limit of lesion above L3, ejaculation rate dropped sharply if the lower limit of the lesion was at L3 or below, compared with patients with an SCI lower limit above L3 (Table IV). This finding could be explained by the greater severity of the lesions affecting the T12–L2 segments when the lesion extends as far as L3 and below. This was, however, ruled out by statistical analyses controlling for lesions of the sympathetic centres. Ejaculation rates were further analysed in patient subgroups with the same number (between 0 and 3) of completely injured segments from T12 to L2. When the lower limit of the lesion was at the level of L3 or below, there was disruption of the intraspinal circuitry between the sympathetic and the parasympathetic and somatic centres whereas, when the lower limit was at L1 or above, there was no such disruption (Fig. 2; Brindley, 1981; Reitz et al., 2002; Ertekin et al., 2007). A complete injury at L2 similarly disrupts connections between sympathetic, parasympathetic and somatic centres even if the T12 and L1 segments are intact and could therefore explain the lower ejaculation rates observed in patients with lesions extending to L3 and below. The results of this review did not provide any support for this hypothesis: among patients with complete lesions at L2, those with a lower limit at L3 or below still had lower ejaculation rates (even if not statistically significant) than patients with a lower limit at L2 (data not shown).

In addition, the ejaculation rate was not lower in the case of lesions of the sacral segments (6/55) compared with when the sacral segments were infralesional (1/23). This further suggests a central role of the L3 to L5 segments in the observed drop in ejaculation rates when the lower limit of complete lesions is below L2. All together, these results suggest a key role of the L3–L5 segments in ejaculation, aside from the already described spinal autonomic and somatic ejaculation centres. In other words, these results support the hypothesis that lesions of the L3–L5 segments do not only disrupt the intraspinal circuitry, but also destroy the SGE thereby preventing coordinated activity of autonomic and somatic centres. Although no definitive evidence for the existence of an SGE in man can be provided, among publications about ejaculation and especially the 45 studies reviewed, no data against the existence of an SGE in man was found. Available clinical data are suggestive of the location of the SGE between the L3 and L5 segments.

Seven patients with complete SCI and absent spinal reflexes of the L3 to L5 segments could still ejaculate following i.t. prostigmine or s.c. physostigmine (Grossiord et al., 1978; Chapelle et al., 1988). These data are not necessarily in contradiction with the existence of an SGE in humans. The neurons which constitute the SGE in rats are interneurons. Lesions at a given level of the spine can lead to different types of involvement of the peripheral nervous system, i.e. rootlets, spinal roots and spinal nerves and/or the central nervous system, i.e. spinal cord may be affected. Complete spinal cord transection is rare even in the case of complete SCI (Kakulas, 1984). Aside from a lesion which spares the SGE, the rootlets, spinal roots and/or spinal nerves of L3, L4 and L5 can be injured. If the clinical examination shows that the L3, L4 and L5 spinal reflexes are abolished, it is likely that there is complete injury of these spinal segments. However, data provided by clinical examinations do not absolutely correlate with anatomical data (Grossiord et al., 1978). The SGE, which coordinates smooth and striated muscle contractions leading to semen expulsion might have been

spared, thereby allowing ejaculation to occur. It is noteworthy that the data in favour of the existence of an SGE in humans have been retrieved from studies in which ejaculation was elicited during masturbation following i.t. prostigmine or s.c. physostigmine. From a pharmacological perspective, the effect of AchE inhibitors on ejaculation could be dual; (i) potentiation of the excitatory action of the putative SGE on autonomic and somatic pathways controlling the peripheral events leading to ejaculation and (ii) direct activation of those pathways. It would have been more convincing if the same results in favour of the existence of an SGE had come from PVS data. Unfortunately, such results are not currently available.

## Conclusion

This systematic review of the data available in SCI men thus confirms the role of the already known spinal ejaculation centres located at the level of the T12–L2 and S2–S4 segments. It also supports the existence of an SGE in humans which is likely to be located at the level of the L3, L4 and L5 segments.

Our understanding of the human spinal physiology of ejaculation needs further improvement. It is essential to provide definite evidence for the existence of an SGE in man. This would allow the transposition of experimental results from rats to humans and open new avenues in pharmacological research for the treatment of various ejaculatory disorders not only including anejaculation in SCI patients but also delayed and premature ejaculation. Restoring ejaculation in SCI patients would allow procreation to occur with little or no medical assistance and better sexual achievement aside from any procreative considerations.

## Authors' roles

C.C. was responsible for data extraction, critical appraisal, data analysis, data interpretation and writing of the report. S.B. and F.G. were responsible for data analysis, data interpretation and writing of the report. P.D. contributed to data interpretation and gave his specialized clinical feedback. P.C. and J.B. contributed to the writing of the report.

## Funding

C.C. is a recipient of (i) a grant for doctoral fellowship from the Versailles Saint-Quentin-en-Yvelines University, France and (ii) a grant from the French Physical and Rehabilitation Medicine Society (SOFMER).

## References

- Alexander M, Rosen RC. Spinal cord injuries and orgasm: a review. *J Sex Marital Ther* 2008;**34**:308–324.
- Alexander CJ, Sipski ML, Findley TW. Sexual activities, desire, and satisfaction in males pre- and post-spinal cord injury. *Arch Sex Behav* 1993;**22**:217–228.
- Anderson KD. Targeting recovery: priorities of the spinal cord-injured population. *J Neurotrauma* 2004;**21**:1371–1383.
- Anderson KD, Borisoff JF, Johnson RD, Stiens SA, Elliott SL. Long-term effects of spinal cord injury on sexual function in men: implications for neuroplasticity. *Spinal Cord* 2007;**45**:338–348.
- Bar-Or D, Salottolo KM, Orlando A, Winkler JV. A randomized double-blind, placebo-controlled multicenter study to evaluate the efficacy and safety of two doses of the tramadol orally disintegrating tablet for the treatment of premature ejaculation within less than 2 min. *Eur Urol* 2012;**61**:736–743.
- Basu S, Lynne CM, Ruiz P, Aballa TC, Ferrell SM, Brackett NL. Cytofluorographic identification of activated T-cell subpopulations in the semen of men with spinal cord injuries. *J Androl* 2002;**23**:551–556.
- Beretta G, Chelo E, Zanollo A. Reproductive aspects in spinal cord injured males. *Paraplegia* 1989;**27**:113–118.
- Bird VG, Brackett NL, Lynne CM, Aballa TC, Ferrell SM. Reflexes and somatic responses as predictors of ejaculation by penile vibratory stimulation in men with spinal cord injury. *Spinal Cord* 2001;**39**:514–519.
- Borgdorff AJ, Bernabe J, Denys P, Alexandre L, Giuliano F. Ejaculation elicited by microstimulation of lumbar spinothalamic neurons. *Eur Urol* 2008;**54**:449–456.
- Borges LF, Iversen SD. Topography of choline acetyltransferase immunoreactive neurons and fibers in the rat spinal cord. *Brain Res* 1986;**362**:140–148.
- Bors E, Comarr AE. Neurological disturbances of sexual function with special reference to 529 patients with spinal cord injury. *Urol Surv* 1960;**10**:191–221.
- Brackett NL. Semen retrieval by penile vibratory stimulation in men with spinal cord injury. *Hum Reprod Update* 1999;**5**:216–222.
- Brackett NL, Santa-Cruz C, Lynne CM. Sperm from spinal cord injured men lose motility faster than sperm from normal men: the effect is exacerbated at body compared to room temperature. *J Urol* 1997;**157**:2150–2153.
- Brackett NL, Cohen DR, Ibrahim E, Aballa TC, Lynne CM. Neutralization of cytokine activity at the receptor level improves sperm motility in men with spinal cord injuries. *J Androl* 2007a;**28**:717–721.
- Brackett NL, Kafetsoulis A, Ibrahim E, Aballa TC, Lynne CM. Application of 2 vibrators salvages ejaculatory failures to 1 vibrator during penile vibratory stimulation in men with spinal cord injuries. *J Urol* 2007b;**177**:660–663.
- Brackett NL, Ibrahim E, Iremashvili V, Aballa TC, Lynne CM. Treatment for ejaculatory dysfunction in men with spinal cord injury: an 18-year single center experience. *J Urol* 2010a;**183**:2304–2308.
- Brackett NL, Lynne CM, Ibrahim E, Ohl DA, Sonksen J. Treatment of infertility in men with spinal cord injury. *Nat Rev Urol* 2010b;**7**:162–172.
- Brindley GS. Reflex ejaculation under vibratory stimulation in paraplegic men. *Paraplegia* 1981;**19**:299–302.
- Brindley GS. The fertility of men with spinal injuries. *Paraplegia* 1984;**22**:337–348.
- Brunton L, Chabner BA, Knollmann B. *Goodman and Gilman's Pharmacological Basis of Therapeutics*, 9th edn, 1995. McGraw-Hill, pp. 105–139.
- Bullock TH, Nachmansohn D, Rothenberg MA. Effects of inhibitors of choline esterase on the nerve action potential. *J Neurophysiol* 1946;**9**:9–22.
- Caremél R, Courtois F, Charvier K, Ruffion A, Journel NM. Side effects of intradetrusor botulinum toxin injections on ejaculation and fertility in men with spinal cord injury: preliminary findings. *BJU Int* 2012;**109**:1698–1702.
- Chapelle PA. Ejaculation in the paraplegic: another method for its induction. *Ann Méd Phys* 1979;**22**:262–266.
- Chapelle PA, Colbeau-Justin P, Durand J, Richard F. Ejaculation problems in traumatic paraplegia. *Sem Hop* 1982;**58**:1691–1697.
- Chapelle PA, Blanquart F, Puech AJ, Held JP. Treatment of anejaculation in the total paraplegic by subcutaneous injection of Physostigmine. *Paraplegia* 1983a;**21**:30–36.
- Chapelle PA, Leroy F, Roby A, Bussel B. Topographical assessment of the lower limit of the lesional syndrome in complete paraplegics. *Ann Readapt Med Phys* 1983b;**26**:369–377.
- Chapelle PA, Leroy F, Lacert P. *Limite inférieure de quelques noyaux moteurs lombo-sacrés*. Paris, France: Elsevier, 1985.
- Chapelle PA, Roby-Brami A, Yakovlev A, Bussel B. Neurological correlations of ejaculation and testicular size in men with a complete spinal cord section. *J Neurol Neurosurg Psychiatry* 1988;**51**:197–202.
- Chapelle PA, Roby-Brami A, Jondet M, Piechaud T, Bussel B. Trophic effects on testes in paraplegics. *Paraplegia* 1993;**31**:576–583.
- Comarr AE. Sexual function among patients with spinal cord injury. *Urol Int* 1970;**25**:134–168.
- Comarr AE. Sexual concepts in traumatic cord and cauda equina lesions. *J Urol* 1971;**106**:375–378.
- Comarr AE, Vigue M. Sexual counseling among male and female patients with spinal cord and/or cauda equina injury. *Am J Phys Med* 1978;**57**:107–122.
- Coolen LM, Peters HJ, Veening JG. Anatomical interrelationships of the medial preoptic area and other brain regions activated following male sexual behavior: a combined fos and tract-tracing study. *J Comp Neurol* 1998;**397**:421–435.



- Courtois FJ, Charvier KF, Leriche A, Raymond DP. Sexual function in spinal cord injury men. I. Assessing sexual capability. *Paraplegia* 1993;**31**:771–784.
- Courtois F, Charvier K, Leriche A, Vezina JG, Cote I, Raymond D, Jacquemin G, Fournier C, Belanger M. Perceived physiological and orgasmic sensations at ejaculation in spinal cord injured men. *J Sex Med* 2008;**5**:2419–2430.
- Courtois F, Charvier K, Vezina JG, Journal NM, Carrier S, Jacquemin G, Cote I. Assessing and conceptualizing orgasm after a spinal cord injury. *BJU Int* 2011;**108**:1624–1633.
- Courty A, Franchebois P. The genital disturbances in arteritis. *Presse Med* 1952;**60**:1379–1381.
- Cripps RA, Lee BB, Wing P, Weerts E, Mackay J, Brown D. A global map for traumatic spinal cord injury epidemiology: towards a living data repository for injury prevention. *Spinal Cord* 2011;**49**:493–501.
- Dahlberg A, Ruutu M, Hovatta O. Pregnancy results from a vibrator application, electroejaculation, and a vas aspiration programme in spinal-cord injured men. *Hum Reprod* 1995;**10**:2305–2307.
- David A, Ohry A, Rozin R. Spinal cord injuries: male infertility aspects. *Paraplegia* 1977;**15**:11–14.
- Dejerine J. *Sémiologie des affections du système nerveux*. Paris, France: Masson, 1914.
- Denys P, Mane M, Azouvi P, Chartier-Kastler E, Thiebaut JB, Bussel B. Side effects of chronic intrathecal baclofen on erection and ejaculation in patients with spinal cord lesions. *Arch Phys Med Rehabil* 1998;**79**:494–496.
- Devivo MJ. Epidemiology of traumatic spinal cord injury: trends and future implications. *Spinal Cord* 2012;**50**:365–372.
- Egon G, Isambert JL, Filipetti P, Colombel P. Induced ejaculation in paraplegics. *Andrologie* 1994;**4**:160–168.
- Eklund MB, Krassioukov AV, McBride KE, Elliott SL. Incidence of autonomic dysreflexia and silent autonomic dysreflexia in men with spinal cord injury undergoing sperm retrieval: implications for clinical practice. *J Spinal Cord Med* 2008;**31**:33–39.
- Elliott S, Krassioukov A. Malignant autonomic dysreflexia in spinal cord injured men. *Spinal Cord* 2006;**44**:386–392.
- Ertekin C, Uysal H, Bademkiran F, Altay B. Sacrolumbar intersegmental reflex circuit in men and its relation to the ejaculatory process. *Clin Neurophysiol* 2007;**118**:2368–2374.
- Everaert K, de Waard WI, Van Hoof T, Kiekens C, Mulliez T, D'Herde C. Neuroanatomy and neurophysiology related to sexual dysfunction in male neurogenic patients with lesions to the spinal cord or peripheral nerves. *Spinal Cord* 2010;**48**:182–191.
- Faganel J, Dimitrijevic MR. Study of propriospinal interneuron system in man. Cutaneous exteroceptive conditioning of stretch reflexes. *J Neurol Sci* 1982;**56**:155–172.
- Fitzpatrick WF. Sexual function in the paraplegic patient. *Arch Phys Med Rehabil* 1974;**55**:221–227.
- Fode M, Krogh-Jespersen S, Brackett NL, Ohl DA, Lynne CM, Sonksen J. Male sexual dysfunction and infertility associated with neurological disorders. *Asian J Androl* 2012;**14**:61–68.
- Francois N, Lichtenberger J, Jouannet P, Desert J, Maury M. L'éjaculation par le vibromassage chez le paraplegique à propos de 50 cas avec 7 grossesses. *Ann Méd Phys* 1980;**23**:24–36.
- Francois N, Jouannet P, Maury M. Genitosexual function of paraplegics. *J Urol (Paris)* 1983;**89**:159–164.
- Frankel HL, Hancock DO, Hyslop G, Melzak J, Michaelis LS, Ungar GH, Vernon JD, Walsh JJ. The value of postural reduction in the initial management of closed injuries of the spine with paraplegia and tetraplegia. I. *Paraplegia* 1969;**7**:179–192.
- Giovannelli Barilari M, Kuypers HG. Propriospinal fibers interconnecting the spinal enlargements in the cat. *Brain Res* 1969;**14**:321–330.
- Giuliano F. 5-Hydroxytryptamine in premature ejaculation: opportunities for therapeutic intervention. *Trends Neurosci* 2007;**30**:79–84.
- Giuliano FA. Tramadol for the treatment of premature ejaculation. *Eur Urol* 2012;**61**:744–745.
- Giuliano F, Clement P. Neuroanatomy and physiology of ejaculation. *Annu Rev Sex Res* 2005;**16**:190–216.
- Giuliano F, Clement P. Pharmacology for the treatment of premature ejaculation. *Pharmacol Rev* 2012;**64**:621–644.
- Giuliano F, Hultling C, El Masry WS, Smith MD, Osterloh IH, Orr M, Maytom M. Randomized trial of sildenafil for the treatment of erectile dysfunction in spinal cord injury. Sildenafil Study Group. *Ann Neurol* 1999;**46**:15–21.
- Giuliano F, Sanchez-Ramos A, Lochner-Ernst D, Del Popolo G, Cruz N, Leriche A, Lombardi G, Reichert S, Dahl P, Elion-Mboussa A et al. Efficacy and safety of tadalafil in men with erectile dysfunction following spinal cord injury. *Arch Neurol* 2007;**64**:1584–1592.
- Giuliano F, Rubio-Aurioles E, Kennelly M, Montorsi F, Kim ED, Finkbeiner AE, Pommerville PJ, Colopy MW, Wachs BH. Vardenafil improves ejaculation success rates and self-confidence in men with erectile dysfunction due to spinal cord injury. *Spine (Phila Pa 1976)* 2008;**33**:709–715.
- Giuliano F, Pfaus J, Srilatha B, Hedlund P, Hisasue S, Marson L, Wallen K. Experimental models for the study of female and male sexual function. *J Sex Med* 2010;**7**:2970–2995.
- Grossiord A, Buzacoux J, Maury M, Barthes G. Studies on Motor Metamerisation of the Upper and Lower Limbs. *Paraplegia* 1963;**1**:81–97.
- Grossiord A, Chapelle PA, Lacert P, Pannier S, Durand J. The affected medullary segment in paraplegics. Relation to sexual function in men (author's transl). *Rev Neurol (Paris)* 1978;**134**:729–740.
- Guttmann L. The effect of prostigmine on the reproductive functions in the spinal man. In: *Proceeding of the 4th International Neurological Congress*, Vol. 2, Masson, p. 69, 1949.
- Guttmann L, Walsh JJ. Prostigmin assessment test of fertility in spinal man. *Paraplegia* 1971;**9**:39–51.
- Hamid R, Patki P, Bywater H, Shah PJ, Craggs MD. Effects of repeated ejaculations on semen characteristics following spinal cord injury. *Spinal Cord* 2006;**44**:369–373.
- Hamson DK, Watson NV. Regional brainstem expression of Fos associated with sexual behavior in male rats. *Brain Res* 2004;**1006**:233–240.
- Heeb MM, Yahr P. Anatomical and functional connections among cell groups in the gerbil brain that are activated with ejaculation. *J Comp Neurol* 2001;**439**:248–258.
- Hellstrom VJ, Sikka SC. Effects of acute treatment with tamsulosin versus alfuzosin on ejaculatory function in normal volunteers. *J Urol* 2006;**176**:1529–1533.
- Hohmann GW. Some effects of spinal cord lesions on experienced emotional feelings. *Psychophysiology* 1966;**3**:143–156.
- Horne HW, Paull DP, Munro D. Fertility studies in the human male with traumatic injuries of the spinal cord and cauda equina. *N Engl J Med* 1948;**239**:959–961.
- Iremashvili VV, Brackett NL, Ibrahim E, Aballa TC, Lynne CM. A minority of men with spinal cord injury have normal semen quality—can we learn from them? A case-control study. *Urology* 2010;**76**:347–351.
- Jackson RV. Sexual rehabilitation after cord injury. *Paraplegia* 1972;**10**:50–55.
- Kafetsoulis A, Brackett NL, Ibrahim E, Attia GR, Lynne CM. Current trends in the treatment of infertility in men with spinal cord injury. *Fertil Steril* 2006;**86**:781–789.
- Kakulas BA. Pathology of spinal injuries. *Cent Nerv Syst Trauma* 1984;**1**:117–129.
- Kinsey AC, Pomeroy WB, Martin CE. *Sexual Behavior in the Human Male*. Bloomington, USA: Indiana University Press, 1998.
- Kirshblum SC, Burns SP, Biering-Sorensen F, Donovan W, Graves DE, Jha A, Johansen M, Jones L, Krassioukov A, Mulcahey MJ et al. International standards for neurological classification of spinal cord injury (revised 2011). *J Spinal Cord Med* 2011;**34**:535–546.
- Klose KJ, Green BA, Smith RS, Adkins RH, MacDonald AM. University of Miami Neuro-Spinal Index (UMNI): a quantitative method for determining spinal cord function. *Paraplegia* 1980;**18**:331–336.
- Kostyuk PG, Vasilenko DA, Lang E. Propriospinal pathways in the dorsolateral funiculus and their effects on lumbosacral motoneuronal pools. *Brain Res* 1971;**28**:233–249.
- Kuhn RA. Functional capacity of the isolated human spinal cord. *Brain* 1950;**73**:1–51.
- Kwok YN, Collier B. Synthesis of acetylcholine from acetate in a sympathetic ganglion. *J Neurochem* 1982;**39**:16–26.
- Le Chapelain L, Nguyen Van Tam P, Dehail P, Berjon JJ, Barat M, Mazaux JM, Joseph PA. Ejaculatory stimulation, quality of semen and reproductive aspects in spinal cord injured men. *Spinal Cord* 1998;**36**:132–136.
- Lindan R, Joiner E, Freehafer AA, Hazel C. Incidence and clinical features of autonomic dysreflexia in patients with spinal cord injury. *Paraplegia* 1980;**18**:285–292.
- Lochner-Ernst D, Mandalka B, Kramer G, Stohrer M. Conservative and surgical semen retrieval in patients with spinal cord injury. *Spinal Cord* 1997;**35**:463–468.
- Lossnitzer K, Letzel H. Efficacy of midodrin in orthostatic circulatory disorders. Results of a 2d multicentric field study of 942 patients. *Med Welt* 1983;**34**:1190–1193.
- Masumori N, Tsukamoto T, Iwasawa A, Furuya R, Sonoda T, Mori M. Ejaculatory disorders caused by alpha-1 blockers for patients with lower urinary tract symptoms suggestive of benign prostatic hyperplasia: comparison of naftopidil and tamsulosin in a randomized multicenter study. *Urol Int* 2009;**83**:49–54.



- McBride F, Quah SP, Scott ME, Dinsmore WW. Tripling of blood pressure by sexual stimulation in a man with spinal cord injury. *J R Soc Med* 2003;**96**:349–350.
- Middleton JW, Dayton A, Walsh J, Rutkowski SB, Leong G, Duong S. Life expectancy after spinal cord injury: a 50-year study. *Spinal Cord* 2012;**50**:803–811.
- Moher D, Liberati A, Tetzlaff J, Altman DG. Preferred reporting items for systematic reviews and meta-analyses: the PRISMA statement. *PLoS Med* 2009;**6**:e1000097.
- Money J. Phantom orgasm in the dreams of paraplegic men and women. *Arch Gen Psychiatry* 1960;**3**:373–382.
- Morley JE, Distiller LA, Lissos I, Lipschitz R, Kay G, Searle DL, Katz M. Testicular function in patients with spinal cord damage. *Horm Metab Res* 1979;**11**:679–682.
- Müller LR, Dahl W. Die Innervation der männlichen Geschlechtsorgane. *Arch Klin Med* 1912;**107**:113–155.
- Munro D, Horne HW Jr, Paull DP. The effect of injury to the spinal cord and cauda equina on the sexual potency of men. *N Engl J Med* 1948;**239**:903–911.
- Navaratnam V, Lewis PR. Cholinesterase-containing neurones in the spinal cord of the rat. *Brain Res* 1970;**18**:411–425.
- Nehra A, Werner MA, Bastuba M, Title C, Oates RD. Vibratory stimulation and rectal probe electroejaculation as therapy for patients with spinal cord injury: semen parameters and pregnancy rates. *J Urol* 1996;**155**:554–559.
- Oates RD, Stakin DR, Crane RJ. Penile vibratory stimulation in the spinal cord injured male to induce ejaculation. *Neurosci Urodyn* 1990;**9**:221.
- Odum L, Sonksen J, Biering-Sorensen F. Seminal somatostatin in men with spinal cord injury. *Paraplegia* 1995;**33**:374–376.
- Ohl DA, Menge AC, Sonksen J. Penile vibratory stimulation in spinal cord injured men: optimized vibration parameters and prognostic factors. *Arch Phys Med Rehabil* 1996;**77**:903–905.
- Ohl DA, Menge AC, Jarow JP. Seminal vesicle aspiration in spinal cord injured men: insight into poor sperm quality. *J Urol* 1999;**162**:2048–2051.
- Onufrowicz B. Notes on the arrangement and function of the cell groups in the sacral region of the spinal cord. *J Nerv Ment Dis* 1899;**26**:498–504.
- Piera JB. The establishment of a prognosis for genito-sexual function in the paraplegic and tetraplegic male. *Paraplegia* 1973;**10**:271–278.
- Previnaire JG, Soler JM, El Masri W, Denys P. Assessment of the sympathetic level of lesion in patients with spinal cord injury. *Spinal Cord* 2009;**47**:122–127.
- Rawicki HB, Hill S. Semen retrieval in spinal cord injured men. *Paraplegia* 1991;**29**:443–446.
- Reitz A, Schmid DM, Curt A, Knapp PA, Schurch B. Sympathetic sudomotor skin activity in human after complete spinal cord injury. *Auton Neurosci* 2002;**102**:78–84.
- Restelli AE, Bertolla RP, Spaine DM, Miotto AJr, Borrelli MJr, Cedenho AP. Quality and functional aspects of sperm retrieved through assisted ejaculation in men with spinal cord injury. *Fertil Steril* 2009;**91**:819–825.
- Rose SS. An investigation into sterility after lumbar ganglionectomy. *Br Med J* 1953;**1**:247–250.
- Rutkowski SB, Middleton JW, Truman G, Hagen DL, Ryan JP. The influence of bladder management on fertility in spinal cord injured males. *Paraplegia* 1995;**33**:263–266.
- Sarkarati M, Rossier AB, Fam BA. Experience in vibratory and electro-ejaculation techniques in spinal cord injury patients: a preliminary report. *J Urol* 1987;**138**:59–62.
- Schroder HD. Anatomical and pathoanatomical studies on the spinal efferent systems innervating pelvic structures. 1. Organization of spinal nuclei in animals. 2. The nucleus X-pelvic motor system in man. *J Auton Nerv Syst* 1985;**14**:23–48.
- Sheel AV, Krassioukov AV, Inglis JT, Elliott SL. Autonomic dysreflexia during sperm retrieval in spinal cord injury: influence of lesion level and sildenafil citrate. *J Appl Physiol* 2005;**99**:53–58.
- Simpson LA, Eng JJ, Hsieh JT, Wolfe DL. The health and life priorities of individuals with spinal cord injury: a systematic review. *J Neurotrauma* 2012;**29**:1548–1555.
- Sjogren K, Egberg K. The sexual experience in younger males with complete spinal cord injury. *Scand J Rehabil Med Suppl* 1983;**9**:189–194.
- Slot O, Drewes A, Andreasen A, Olsson A. Erectile and ejaculatory function of males with spinal cord injury. *Int Disabil Stud* 1989;**11**:75–77.
- Soler JM, Previnaire JG, Plante P, Denys P, Chartier-Kastler E. Midodrine improves ejaculation in spinal cord injured men. *J Urol* 2007;**178**:2082–2086.
- Soler JM, Previnaire JG, Plante P, Denys P, Chartier-Kastler E. Midodrine improves orgasm in spinal cord-injured men: the effects of autonomic stimulation. *J Sex Med* 2008;**5**:2935–2941.
- Soler JM, Previnaire JG, Robain G. Ejaculation with penile vibratory stimulation: 202 spinal cord injury patients. *Ann Phys Rehabil Med* 2011;**54**:e308.
- Sonksen J. Assisted ejaculation and semen characteristics in spinal cord injured males. *Scand J Urol Nephrol Suppl* 2003;**213**:1–31.
- Sonksen J, Ohl DA. Penile vibratory stimulation and electroejaculation in the treatment of ejaculatory dysfunction. *Int J Androl* 2002;**25**:324–332.
- Sonksen J, Biering-Sorensen F, Kristensen JK. Ejaculation induced by penile vibratory stimulation in men with spinal cord injuries. The importance of the vibratory amplitude. *Paraplegia* 1994;**32**:651–660.
- Sonksen J, Ohl DA, Giwerzman A, Biering-Sorensen F, Kristensen JK. Quality of semen obtained by penile vibratory stimulation in men with spinal cord injuries: Observations and predictors. *Urology* 1996;**48**:453–457.
- Sonksen J, Sommer P, Biering-Sorensen F, Ziebe S, Lindhard A, Loft A, Andersen AN, Kristensen JK. Pregnancy after assisted ejaculation procedures in men with spinal cord injury. *Arch Phys Med Rehabil* 1997;**78**:1059–1061.
- Sonksen J, Ohl DA, Wedemeyer G. Sphincteric events during penile vibratory stimulation and electroejaculation in men with spinal cord injuries. *J Urol* 2001;**165**:426–429.
- Sonksen J, Fode M, Lochner-Ernst D, Ohl DA. Vibratory ejaculation in 140 spinal cord injured men and home insemination of their partners. *Spinal Cord* 2012;**50**:63–66.
- Staudt MD, Truitt WA, McKenna KE, de Oliveira CV, Lehman MN, Coolen LM. A pivotal role of lumbar spinothalamic cells in the regulation of ejaculation via intraspinal connections. *J Sex Med* 2012;**9**:2256–2265.
- Sun XQ, Xu C, Leclerc P, Benoit G, Giuliano F, Droupy S. Spinal neurons involved in the control of the seminal vesicles: a transsynaptic labeling study using pseudorabies virus in rats. *Neuroscience* 2009;**158**:786–797.
- Szasz G, Carpenter C. Clinical observations in vibratory stimulation of the penis of men with spinal cord injury. *Arch Sex Behav* 1989;**18**:461–474.
- Takahashi H, Buccafusco JJ. Excitatory modulation by a spinal cholinergic system of a descending sympathoexcitatory pathway in rats. *Neuropharmacology* 1992;**31**:259–269.
- Talbot HS. A report on sexual function in paraplegics. *J Urol* 1949;**61**:265–270.
- Talbot HS. The sexual function in paraplegia. *J Urol* 1955;**73**:91–100.
- Tas I, Yagiz On A, Altay B, Ozdedeli K. Electrophysiological assessment of sexual dysfunction in spinal cord injured patients. *Spinal Cord* 2007;**45**:298–303.
- Togashi H, Matsumoto M, Yoshioka M, Hirokami M, Tochiara M, Saito H. Acetylcholine measurement of cerebrospinal fluid by *in vivo* microdialysis in freely moving rats. *Jpn J Pharmacol* 1994;**66**:67–74.
- Truitt WA, Coolen LM. Identification of a potential ejaculation generator in the spinal cord. *Science* 2002;**297**:1566–1569.
- Tsuji I, Nakajima F, Morimoto J, Nounaka Y. The sexual function in patients with spinal cord injury. *Urol Int* 1961;**12**:270–280.
- Umeda E, Aramaki Y, Mori T, Kazama T. Muscarinic receptor subtypes modulate the release of [3H]-noradrenaline in rat spinal cord slices. *Brain Res Bull* 2006;**70**:99–102.
- Uyttendaele D, D'Hooghe M, Brusselmans W, De Groote W, Claessens H. The sexual problem in tetra- and paraplegia: physical and relational aspects. *Acta Orthop Belg* 1979;**45**:470–479.
- Waldinger MD, Hengeveld MW, Zwinderman AH, Olivier B. Effect of SSRI antidepressants on ejaculation: a double-blind, randomized, placebo-controlled study with fluoxetine, fluvoxamine, paroxetine, and sertraline. *J Clin Psychopharmacol* 1998;**18**:274–281.
- Whitelaw GP, Smithwick RH. Some secondary effects of sympathectomy; with particular reference to disturbance of sexual function. *N Engl J Med* 1951;**245**:121–130.
- Wright RA, Kaufmann HC, Perera R, Opfer-Gehrking TL, McElligott MA, Sheng KN, Low PA. A double-blind, dose-response study of midodrine in neurogenic orthostatic hypotension. *Neurology* 1998;**51**:120–124.
- Xu C, Yaici ED, Conrath M, Blanchard P, Leclerc P, Benoit G, Verge D, Giuliano F. Galanin and neurokinin-1 receptor immunoreactive [corrected] spinal neurons controlling the prostate and the bulbospongiosus muscle identified by transsynaptic labeling in the rat. *Neuroscience* 2005;**134**:1325–1341.
- Xu C, Giuliano F, Yaici ED, Conrath M, Trassard O, Benoit G, Verge D. Identification of lumbar spinal neurons controlling simultaneously the prostate and the bulbospongiosus muscles in the rat. *Neuroscience* 2006;**138**:561–573.
- Zeitlin AB, Cottrell TL, Lloyd FA. Sexology of the paraplegic male. *Fertil Steril* 1957;**8**:337–344.

Appendix

American Spinal Injury Association: International Standards for Neurological Classification of Spinal Cord Injury, revised 2011; Atlanta, GA. Reprinted 2011.

Patient Name \_\_\_\_\_

Examiner Name \_\_\_\_\_ Date/Time of Exam \_\_\_\_\_

**ASIA** INTERNATIONAL STANDARDS FOR NEUROLOGICAL CLASSIFICATION OF SPINAL CORD INJURY **ISCOS**

**MOTOR** KEY MUSCLES (scoring on reverse side)

|                                     | R | L |
|-------------------------------------|---|---|
| C5                                  |   |   |
| C6                                  |   |   |
| C7                                  |   |   |
| C8                                  |   |   |
| T1                                  |   |   |
| UPPER LIMB TOTAL (25) + (25) = (50) |   |   |

Comments: \_\_\_\_\_

|                                     | R | L |
|-------------------------------------|---|---|
| L2                                  |   |   |
| L3                                  |   |   |
| L4                                  |   |   |
| L5                                  |   |   |
| S1                                  |   |   |
| LOWER LIMB TOTAL (25) + (25) = (50) |   |   |

(VAC) Voluntary anal contraction (Yes/No) \_\_\_\_\_

**SENSORY** KEY SENSORY POINTS

|                            | R | L |
|----------------------------|---|---|
| C2                         |   |   |
| C3                         |   |   |
| C4                         |   |   |
| C5                         |   |   |
| C6                         |   |   |
| C7                         |   |   |
| C8                         |   |   |
| T1                         |   |   |
| T2                         |   |   |
| T3                         |   |   |
| T4                         |   |   |
| T5                         |   |   |
| T6                         |   |   |
| T7                         |   |   |
| T8                         |   |   |
| T9                         |   |   |
| T10                        |   |   |
| T11                        |   |   |
| T12                        |   |   |
| L1                         |   |   |
| L2                         |   |   |
| L3                         |   |   |
| L4                         |   |   |
| L5                         |   |   |
| S1                         |   |   |
| S2                         |   |   |
| S3                         |   |   |
| S4-5                       |   |   |
| TOTALS (56) (56) (56) (56) |   |   |

0 = absent  
1 = altered  
2 = normal  
NT = not testable

(DAP) Deep anal pressure (yes/no) \_\_\_\_\_

PIN PRICK SCORE (max: 112) \_\_\_\_\_

LIGHT TOUCH SCORE (max: 112) \_\_\_\_\_

**NEUROLOGICAL LEVEL** The most caudal segment with normal function

**SINGLE NEUROLOGICAL LEVEL** \_\_\_\_\_

**COMPLETE OR INCOMPLETE?** Incomplete = Any sensory or motor function in S4-S5

**ASIA IMPAIRMENT SCALE (AIS)** \_\_\_\_\_

**ZONE OF PARTIAL PRESERVATION** Most caudal level with any preservation

**Key Sensory Points**

This form may be copied freely but should not be altered without permission from the American Spinal Injury Association.

Muscle Function Grading

- 0 = total paralysis
- 1 = palpable or visible contraction
- 2 = active movement, full range of motion (ROM) with gravity eliminated
- 3 = active movement, full ROM against gravity
- 4 = active movement, full ROM against gravity and moderate resistance in a muscle specific position.
- 5 = (normal) active movement, full ROM against gravity and full resistance in a muscle specific position expected from an otherwise unimpaired person.
- 5\* = (normal) active movement, full ROM against gravity and sufficient resistance to be considered normal if identified inhibiting factors (i.e. pain, disuse) were not present.

NT = not testable (i.e. due to immobilization, severe pain such that the patient cannot be graded, amputation of limb, or contracture of >50% of the range of motion).

ASIA Impairment (AIS) Scale

- ☐ **A = Complete.** No sensory or motor function is preserved in the sacral segments S4-S5.
- ☐ **B = Sensory Incomplete.** Sensory but not motor function is preserved below the neurological level and includes the sacral segments S4-S5 (light touch, pin prick at S4-S5; or deep anal pressure (DAP)), AND no motor function is preserved more than three levels below the motor level on either side of the body.
- ☐ **C = Motor Incomplete.** Motor function is preserved below the neurological level\*\*, and more than half of key muscle functions below the single neurological level of injury (NLI) have a muscle grade less than 3 (Grades 0-2).
- ☐ **D = Motor Incomplete.** Motor function is preserved below the neurological level\*\*, and at least half (half or more) of key muscle functions below the NLI have a muscle grade  $\geq 3$ .
- ☐ **E = Normal.** If sensation and motor function as tested with the ISNCSCI are graded as normal in all segments, and the patient had prior deficits, then the AIS grade is E. Someone without an initial SCI does not receive an AIS grade.

\*\*For an individual to receive a grade of C or D, i.e. motor incomplete status, they must have either (1) voluntary anal sphincter contraction or (2) sacral sensory sparing with sparing of motor function more than three levels below the motor level for that side of the body. The Standards at this time allows even non-key muscle function more than 3 levels below the motor level to be used in determining motor incomplete status (AIS B versus C).

NOTE: When assessing the extent of motor sparing below the level for distinguishing between AIS B and C, the motor level on each side is used; whereas to differentiate between AIS C and D (based on proportion of key muscle functions with strength grade 3 or greater) the single neurological level is used.

Steps in Classification

The following order is recommended in determining the classification of individuals with SCI.

- Determine sensory levels for right and left sides.
- Determine motor levels for right and left sides.  
*Note: in regions where there is no myotome to test, the motor level is presumed to be the same as the sensory level, if testable motor function above that level is also normal.*
- Determine the single neurological level.  
*This is the lowest segment where motor and sensory function is normal on both sides, and is the most cephalad of the sensory and motor levels determined in steps 1 and 2.*
- Determine whether the injury is Complete or Incomplete. (i.e. absence or presence of sacral sparing)  
*If voluntary anal contraction = No AND all S4-5 sensory scores = 0 AND deep anal pressure = No, then injury is COMPLETE. Otherwise, injury is incomplete.*
- Determine ASIA Impairment Scale (AIS) Grade:  
**Is injury Complete?**  
NO  
If YES, AIS=A and can record ZPP (lowest dermatome or myotome on each side with some preservation)  
**Is injury motor Incomplete?**  
YES  
If NO, AIS=B (Yes=voluntary anal contraction OR motor function more than three levels below the motor level on a given side, if the patient has sensory incomplete classification)  
**Are at least half of the key muscles below the single neurological level graded 3 or better?**  
NO  
AIS=C  
YES  
AIS=D

If sensation and motor function is normal in all segments, AIS=E.  
*Note: AIS E is used in follow-up testing when an individual with a documented SCI has recovered normal function. If at initial testing no deficits are found, the individual is neurologically intact; the ASIA Impairment Scale does not apply.*
